# Supplementary material
Source: PubMed Central journal article supplement (PMC3485712)
Supplement: AEM.02157-12_zam999103800so1.pdf [file AEM.02157-12_zam999103800so1.pdf]

Table S1. Primers used in this study

| Name        | Oligonucleotide sequence (5' to 3') <sup>a</sup>                              | Purpose                                                       | Reference  |
|-------------|-------------------------------------------------------------------------------|---------------------------------------------------------------|------------|
| hdeA_UFP1   | aaattgattcgtgacggctctttcactttatagtga<br>ggatattacgatgGTGTAGGCTGGAG<br>CTGCTTC | Deletion of the <i>hdeAB</i> genes                            | (1)        |
| hdeB_DRP2   | gagcagcaagatggctcaactgccactcctttta<br>cttgtaacctcattaATGGGAATTAGCC<br>ATGGTCC | Deletion of the <i>hdeAB</i> genes                            | (1)        |
| hdeAB_UF    | acagcaaccgacgataaac                                                           | Screen of the <i>hdeAB</i> deletion mutant                    | (1)        |
| hdeAB_DR    | agatggctcaactgccact                                                           | Screen of the <i>hdeAB</i> deletion mutant                    | (1)        |
| pBBR1MCS-F  | gttttcccagtcacgacgtt                                                          | Specific to plasmid pBBR1MCS-5,<br>upstream of the MCS site   | (1)        |
| pBBR1MCS-R  | ggctcgtatgtgtgtggaa                                                           | Specific to plasmid pBBR1MCS-5,<br>downstream of the MCS site | (1)        |
| rcsB_FKpnI  | gat <b>cggtacc</b> cgctattatgcgctctttg                                        | Cloning the <i>rcsB</i> gene                                  | This study |
| rcsB_RHind3 | gat <b>caagcttt</b> tatatgccgagagggtcagg                                      | Cloning the <i>rcsB</i> gene                                  | This study |
| rpoS-F1     | gagggcaaagtatcgaaac                                                           | Sequencing the <i>rpoS</i> gene of curli variants             | This study |
| rpoS-F2     | gccggatgatcagagtaac                                                           | Sequencing the <i>rpoS</i> gene of curli variants             | This study |
| rpoS-R1     | ttgagtgcagaagagcagga                                                          | Sequencing the <i>rpoS</i> gene of curli variants             | This study |
| rpoS-R2     | ggcttatccagttgctctgc                                                          | Sequencing the <i>rpoS</i> gene of curli variants             | This study |
| hns-F1      | gcagcgcgatgacaacacctat                                                        | Sequencing the <i>hns</i> gene of curli variants              | This study |
| hns-F2      | cctggctattgcacaactga                                                          | Sequencing the <i>hns</i> gene of curli variants              | This study |
| hns-R1      | agcctggcttgaagaagaga                                                          | Sequencing the <i>hns</i> gene of curli variants              | This study |
| hns-R2      | cgagggatttaccttgctca                                                          | Sequencing the <i>hns</i> gene of curli variants              | This study |
| rcsB-UF     | gtgaaacgctggaacatctg                                                          | Sequencing the <i>rcsB</i> gene of curli variants             | This study |
| rcsB-DR     | tatatgccgagagggtcagg                                                          | Sequencing the <i>rcsB</i> gene of curli variants             | This study |
| rcsB-F      | tctggatatcgaaggatcg                                                           | Sequencing the <i>rcsB</i> gene of curli variants             | This study |
| rcsB-R      | aacagcgcgagaacttcaact                                                         | Sequencing the <i>rcsB</i> gene of curli variants             | This study |

<sup>a</sup>Nucleotides in upper cases represent the template plasmid pKD4 specific sequence; the first 50 nucleotides in a gene knockout primer are either upstream (UP) or downstream (DR) of the deleting gene; nucleotides in lower cases and bold are the endonuclease restriction sites incorporated in the primers to facilitate the cloning.

Table S2. Up-regulated genes in C<sup>+</sup> variant of *E. coli* O157:H7 strain RM6607

| ID    | Gene        | Product                                                                                       | COG <sup>a</sup> | Fold Change <sup>b</sup> |
|-------|-------------|-----------------------------------------------------------------------------------------------|------------------|--------------------------|
| Z2001 | <i>narG</i> | Nitrate reductase 1, alpha subunit                                                            | COG5013C         | 2.0                      |
| Z2275 | Z2275       | Putative aldehyde dehydrogenase                                                               | COG1012C         | 5.4                      |
| Z2615 | <i>fumA</i> | Fumarase A = fumarate hydratase Class I; aerobic isozyme                                      | COG1951C         | 3.2                      |
| Z2778 | Z2778       | Putative aldehyde dehydrogenase                                                               | COG1012C         | 5.6                      |
| Z3713 | <i>cchA</i> | Detox protein                                                                                 | COG4577QC        | 3.0                      |
| Z5008 | <i>aldB</i> | Aldehyde dehydrogenase B (lactaldehyde dehydrogenase)                                         | COG1012C         | 2.0                      |
| Z5435 | <i>fdoH</i> | Formate dehydrogenase-O, iron-sulfur subunit                                                  | COG0437C         | 2.1                      |
| Z5724 | <i>fumB</i> | Fumarase B= fumarate hydratase class I; anaerobic isozyme                                     | COG1951C         | 2.4                      |
| Z1936 | <i>minE</i> | Cell division topological specificity factor, reverses MinC inhibition of ftsZ ring formation | COG0851D         | 2.3                      |
| Z0671 | <i>ylbB</i> | Putative hydantoin utilization protein                                                        | COG0624E         | 2.9                      |
| Z0802 | <i>gltL</i> | ATP-binding protein of glutamate/aspartate transport system                                   | COG1126E         | 2.4                      |
| Z0803 | <i>gltK</i> | Glutamate/aspartate transport system permease                                                 | COG0765E         | 3.0                      |
| Z0804 | <i>gltJ</i> | Glutamate/aspartate transport system permease                                                 | COG0765E         | 2.5                      |
| Z0805 | <i>ybeJ</i> | Putative periplasmic binding transport protein                                                | COG0834ET        | 3.3                      |
| Z1033 | <i>glnH</i> | Periplasmic glutamine-binding protein; permease                                               | COG0834ET        | 2.3                      |
| Z1952 | <i>dada</i> | D-amino acid dehydrogenase subunit                                                            | COG0665E         | 2.1                      |
| Z2022 | <i>oppD</i> | Homolog of Salmonella ATP-binding protein of oligopeptide ABC transport system                | COG0444EP        | 2.2                      |
| Z2223 | Z2223       | Putative hemin-binding lipoprotein                                                            | COG0747E         | 3.8                      |
| Z2224 | Z2224       | Putative transport system permease protein                                                    | COG0601EP        | 2.4                      |
| Z2276 | Z2276       | Putative transport system permease protein                                                    | COG1177E         | 6.7                      |
| Z2277 | Z2277       | Putative transport system permease protein                                                    | COG1176E         | 3.8                      |
| Z2278 | Z2278       | Putative ATP-binding component of a transport system                                          | COG3842E         | 5.5                      |
| Z2279 | Z2279       | Putative transport protein                                                                    | COG0687E         | 5.7                      |
| Z2776 | <i>ydjS</i> | Succinylglutamate desuccinylase                                                               | COG2988E         | 4.5                      |
| Z2777 | Z2777       | Succinylarginine dihydrolase                                                                  | COG3724E         | 6.0                      |
| Z2779 | Z2779       | Arginine succinyltransferase                                                                  | COG3138E         | 5.8                      |
| Z2780 | <i>cstC</i> | Acetylornithine delta-aminotransferase                                                        | COG4992E         | 4.9                      |
| Z3010 | <i>fliY</i> | Putative periplasmic binding transport protein                                                | COG0834ET        | 6.4                      |
| Z3568 | <i>hisP</i> | Histidine/lysine/arginine/ornithine transporter subunit                                       | COG4598E         | 4.2                      |
| Z3569 | <i>hisM</i> | Histidine transport, membrane protein M                                                       | COG4160E         | 2.1                      |
| Z3570 | <i>hisQ</i> | Histidine transport system permease protein                                                   | COG4215E         | 2.7                      |
| Z3571 | <i>hisJ</i> | Histidine-binding periplasmic protein of high-affinity histidine transport system             | COG0834ET        | 2.8                      |
| Z3572 | <i>argT</i> | Lysine-, arginine-, ornithine-binding periplasmic protein                                     | COG0834ET        | 3.9                      |
| Z3717 | Z3717       | Hypothetical protein                                                                          | COG4917E         | 2.6                      |
| Z4241 | <i>gcvH</i> | Glycine cleavage system protein H                                                             | COG0509E         | 2.2                      |
| Z4242 | <i>gcvT</i> | Glycine cleavage system aminomethyltransferase T                                              | COG0404E         | 2.2                      |
| Z4961 | <i>dppA</i> | Dipeptide transport protein                                                                   | COG0747E         | 2.4                      |

|                          |                                |                                                                                                                |            |      |
|--------------------------|--------------------------------|----------------------------------------------------------------------------------------------------------------|------------|------|
| Z5744                    | <i>aspA</i>                    | Aspartate ammonia-lyase                                                                                        | COG1027E   | 5.3  |
| Z0801                    | <i>ybeK</i>                    | Putative tRNA synthetase                                                                                       | COG1957F   | 3.0  |
| <b>Z3196</b>             | <i>wbdQ</i>                    | GDP-mannose mannosylhydrolase                                                                                  | COG1051F   | 2.1  |
| Z0826                    | <i>nagE</i>                    | PTS system, N-acetylglucosamine-specific enzyme<br>IIABC                                                       | COG1263G   | 2.5  |
| Z1109                    | <i>aqpZ</i>                    | Transmembrane water channel                                                                                    | COG0580G   | 2.6  |
| Z1314                    | <i>mgsA</i>                    | Methylglyoxal synthase                                                                                         | COG1803G   | 2.4  |
| Z2188                    | <i>yneB</i>                    | Aldolase                                                                                                       | COG1830G   | 2.6  |
| Z2189                    | <i>Z2189</i>                   | Putative LACI-type transcriptional regulator                                                                   | COG1879G   | 2.7  |
| Z2192                    | <i>Z2192</i>                   | Putative ATP-binding component of a transport system                                                           | COG1129G   | 2.5  |
| Z2194                    | <i>ydeV</i>                    | Autoinducer-2 (AI-2) kinase                                                                                    | COG1070G   | 2.9  |
| Z2463                    | <i>ycjV</i>                    | Putative ATP-binding component of a transport system                                                           | COG3839G   | 2.1  |
| <b>Z3194</b>             | <i>manB</i>                    | Phosphomannomutase                                                                                             | COG1109G   | 2.0  |
| Z3431                    | <i>yeiQ</i>                    | Putative oxidoreductase                                                                                        | COG0246G   | 3.5  |
| Z4819                    | <i>ugpE</i>                    | Glycerol-3-phosphate transporter membrane protein                                                              | COG0395G   | 2.4  |
| Z4820                    | <i>ugpA</i>                    | Glycerol-3-phosphate transporter permease                                                                      | COG1175G   | 3.1  |
| Z4822                    | <i>ugpB</i>                    | Glycerol-3-phosphate transporter periplasmic binding<br>protein                                                | COG1653G   | 3.2  |
| Z4991                    | <i>xylF</i>                    | D-xylose transporter subunit XylF                                                                              | COG4213G   | 2.0  |
| Z5252                    | <i>rbsB</i>                    | D-ribose transporter subunit RbsB                                                                              | COG1879G   | 2.3  |
| Z5409                    | <i>yihM</i>                    | Hypothetical protein                                                                                           | COG1082G   | 2.6  |
| <b>Z5691</b>             | <i>Z5691</i>                   | Putative ATP-binding protein of ribose ABC transport<br>system                                                 | COG1129G   | 2.1  |
| Z5838                    | <i>ytfQ</i>                    | Putative LACI-type transcriptional regulator                                                                   | COG1879G   | 2.7  |
| Z5839                    | <i>Z5839</i>                   | Putative ATP-binding component of ABC transporter                                                              | COG1129G   | 2.2  |
| Z0278                    | <i>yafH</i><br>( <i>fadE</i> ) | Putative acyl-CoA dehydrogenase, functions in fatty<br>acid oxidation                                          | COG1960I   | 5.7  |
| Z2624                    | <i>hdhA</i>                    | NAD-dependent 7alpha-hydroxysteroid dehydrogenase,<br>dehydroxylation of bile acids                            | COG1028IQR | 2.0  |
| Z2848                    | <i>fadD</i>                    | Acyl-CoA synthetase, long-chain-fatty-acid--CoA ligase                                                         | COG0318IQ  | 5.4  |
| Z3604                    | <i>Z3604</i>                   | Multifunctional fatty acid oxidation complex subunit<br>alpha                                                  | COG1250I   | 3.6  |
| Z3605                    | <i>Z3605</i>                   | 3-ketoacyl-CoA thiolase                                                                                        | COG0183I   | 3.1  |
| Z3608                    | <i>fadL</i>                    | Long-chain fatty acid outer membrane transporter                                                               | COG2067I   | 4.4  |
| Z3691                    | <i>ucpA</i>                    | Short chain dehydrogenase                                                                                      | COG1028IQR | 4.3  |
| Z5366                    | <i>fadA</i>                    | 3-ketoacyl-CoA thiolase                                                                                        | COG0183I   | 4.2  |
| Z5367                    | <i>fadB</i>                    | Multifunctional fatty acid oxidation complex subunit<br>alpha                                                  | COG1250I   | 5.9  |
| Z5668                    | <i>acs</i>                     | Acetyl-CoA synthetase                                                                                          | COG0365I   | 5.0  |
| <b>Z0463<sup>c</sup></b> | <i>Z0463</i>                   | Putative response regulator; hexosephosphate transport                                                         | COG2197TK  | 2.5  |
| Z1117                    | <i>cspD</i>                    | Cold shock protein                                                                                             | COG1278K   | 3.0  |
| <b>Z1531<sup>c</sup></b> | <i>Z1531</i>                   | Putative regulator; Not classified                                                                             | COG3710K   | 2.8  |
| Z1673                    | <i>csgD</i>                    | Putative 2-component transcriptional regulator for 2nd<br>curli operon                                         | COG2197TK  | 13.4 |
| Z2269                    | <i>Z2269</i>                   | DNA-binding transcriptional regulator                                                                          | COG1802K   | 2.4  |
| Z2299                    | <i>Z2299</i>                   | Putative transcriptional regulator LYSR-type                                                                   | COG0583K   | 2.0  |
| Z2479                    | <i>pspC</i>                    | Phage shock protein: activates the <i>psp</i> operon in<br>response to phage infection, exposure to ethanol or | COG1983KT  | 2.1  |

|                          |              |                                                                                                                                |           |     |
|--------------------------|--------------|--------------------------------------------------------------------------------------------------------------------------------|-----------|-----|
|                          |              | osmotic shock                                                                                                                  |           |     |
| Z2868                    | <i>cspC</i>  | Cold shock protein                                                                                                             | COG1278K  | 2.7 |
| Z3804                    | <i>csiE</i>  | Stationary phase inducible protein CsiE                                                                                        | COG3711K  | 2.0 |
| <b>Z4198</b>             | <i>Z4198</i> | Putative regulatory protein for type III secretion apparatus                                                                   | COG2207K  | 2.5 |
| Z4208                    | <i>ygeV</i>  | Putative transcriptional regulator                                                                                             | COG3829KT | 3.6 |
| Z5524                    | <i>yijC</i>  | DNA-binding transcriptional repressor FabR                                                                                     | COG1309K  | 2.4 |
| <b>Z5684<sup>c</sup></b> | <i>Z5684</i> | Putative transcriptional regulator                                                                                             | COG0745TK | 3.1 |
| <b>Z1871</b>             | <i>Z1871</i> | Unknown protein encoded by prophage CP-933X                                                                                    | COG1961L  | 3.1 |
| Z2253                    | <i>Z2253</i> | H repeat-associated protein of Rhs element                                                                                     | COG5433L  | 2.0 |
| <b>Z0608<sup>c</sup></b> | <i>Z0608</i> | Putative outer membrane export protein                                                                                         | COG1538MU | 2.6 |
| Z1670                    | <i>csgG</i>  | Curli production assembly/transport component, 2nd curli operon                                                                | COG1462M  | 7.9 |
| Z1931                    | <i>Z1931</i> | Outer membrane protein 3b (a), protease VII                                                                                    | COG4571M  | 2.6 |
| Z1953                    | <i>dadX</i>  | Alanine racemase 2, catabolic                                                                                                  | COG0787M  | 2.2 |
| Z2222                    | <i>Z2222</i> | D-alanyl-D-alanine dipeptidase                                                                                                 | COG2173M  | 2.3 |
| Z2446                    | <i>Z2446</i> | Unknown function                                                                                                               | COG0451MG | 2.2 |
| <b>Z3195</b>             | <i>manC</i>  | Mannose-1-P guanosyltransferase                                                                                                | COG0836M  | 2.6 |
| <b>Z3197</b>             | <i>fcI</i>   | Fucose synthetase                                                                                                              | COG0451MG | 2.3 |
| <b>Z3198</b>             | <i>Z3198</i> | GDP-mannose dehydratase                                                                                                        | COG1089M  | 2.2 |
| <b>Z3199</b>             | <i>wbdP</i>  | Glycosyl transferase                                                                                                           | COG0438M  | 2.3 |
| <b>Z3200</b>             | <i>per</i>   | Perosamine synthetase                                                                                                          | COG0399M  | 2.7 |
| Z3205                    | <i>galF</i>  | Homolog of Salmonella UTP--glucose-1-P uridyltransferase, probably a UDP-gal transferase                                       | COG1210M  | 3.0 |
| Z5227                    | <i>glmS</i>  | D-fructose-6-phosphate amidotransferase                                                                                        | COG0449M  | 3.5 |
| Z0291                    | <i>mbhA</i>  | Putative motility protein                                                                                                      | COG1360N  | 2.1 |
| Z4280                    | <i>yggG</i>  | Hypothetical protein                                                                                                           | COG0501O  | 2.0 |
| L7017                    | <i>katP</i>  | EHEC-catalase/peroxidase                                                                                                       | COG0376P  | 2.1 |
| Z0724                    | <i>fepA</i>  | outer membrane receptor for ferric enterobactin (enterochelin) and colicins                                                    | COG4771P  | 2.6 |
| Z2477                    | <i>pspE</i>  | Phage shock protein                                                                                                            | COG0607P  | 2.2 |
| <b>Z3392<sup>c</sup></b> | <i>Z3392</i> | Putative isomerase-decarboxylase                                                                                               | COG0179Q  | 2.2 |
| <b>Z3393<sup>c</sup></b> | <i>Z3393</i> | Putative 1,2-dioxygenase                                                                                                       | COG3435Q  | 2.4 |
| Z2010                    | <i>yckK</i>  | Hypothetical protein                                                                                                           | COG1752R  | 2.1 |
| <b>Z3192</b>             | <i>wbdR</i>  | Acetyl transferase; O-antigen biosynthesis                                                                                     | COG0110R  | 3.1 |
| <b>Z3201</b>             | <i>wzx</i>   | O antigen flippase Wzx                                                                                                         | COG2244R  | 3.1 |
| Z3693                    | <i>murQ</i>  | N-acetylmuramic acid-6-phosphate etherase                                                                                      | COG2103R  | 2.1 |
| Z4052                    | <i>surE</i>  | Stationary phase survival protein SurE                                                                                         | COG0496R  | 2.0 |
| Z4216                    | <i>ygfJ</i>  | Hypothetical protein                                                                                                           | COG2068R  | 3.0 |
| <b>Z5153<sup>c</sup></b> | <i>Z5153</i> | Hypothetical protein                                                                                                           | COG2252R  | 2.3 |
| Z5666                    | <i>yjcG</i>  | Acetate permease                                                                                                               | COG4147R  | 5.2 |
| Z5743                    | <i>dcuA</i>  | Anaerobic C4-dicarboxylate transporter                                                                                         | COG2704R  | 2.7 |
| Z5827                    | <i>ytfJ</i>  | Hypothetical protein                                                                                                           | COG3054R  | 2.6 |
| Z0503                    | <i>yajB</i>  | Putative glycoprotein, converts holo-ACP to apo-ACP by hydrolytic cleavage of the phosphopantetheine prosthetic group from ACP | COG3124S  | 2.4 |
| Z1315                    | <i>Z1315</i> | Hypothetical protein                                                                                                           | COG3110S  | 2.6 |

|                          |             |                                                                                                                                                                             |          |      |
|--------------------------|-------------|-----------------------------------------------------------------------------------------------------------------------------------------------------------------------------|----------|------|
| Z2187                    | Z2187       | Autoinducer-2 (AI-2) modifying protein LsrG                                                                                                                                 | COG1359S | 2.2  |
| Z2292                    | <i>ycdH</i> | Unknown function                                                                                                                                                            | COG2841S | 3.9  |
| Z4053                    | <i>ygbO</i> | tRNA pseudouridine synthase D                                                                                                                                               | COG0585S | 2.1  |
| Z5667                    | <i>yjcH</i> | Hypothetical protein                                                                                                                                                        | COG3162S | 6.0  |
| Z0156                    | <i>dksA</i> | Suppressor protein of the <i>dnaK</i>                                                                                                                                       | COG1734T | 2.1  |
| Z0481                    | <i>yaiC</i> | Diguanylate cyclase AdrA, catalyzes the conversion of 2 GTP into c-di-GMP                                                                                                   | COG2199T | 3.2  |
| Z0539                    | <i>bolA</i> | Transcriptional regulator BolA, positive transcriptional regulator of morphogenetic pathway; controlling several genes involved in stress                                   | COG0271T | 2.1  |
| Z0740                    | <i>cstA</i> | Carbon starvation protein                                                                                                                                                   | COG1966T | 3.0  |
| Z1522                    | <i>phoH</i> | PhoB-dependent, ATP-binding pho regulon component; may be helicase; induced by P starvation                                                                                 | COG1702T | 3.7  |
| <b>Z1528<sup>c</sup></b> | Z1528       | Unknown function                                                                                                                                                            | COG2200T | 3.4  |
| Z2219                    | Z2219       | Hypothetical protein                                                                                                                                                        | COG2199T | 2.1  |
| Z2421                    | Z2421       | Hypothetical protein                                                                                                                                                        | COG2199T | 4.7  |
| Z0065                    | Z0065       | Unknown function                                                                                                                                                            | -        | 2.3  |
| Z0301                    | <i>crl</i>  | Transcriptional regulator of cryptic <i>csgA</i> gene for curli surface fibers                                                                                              | -        | 2.1  |
| Z0425                    | <i>yahO</i> | Hypothetical protein                                                                                                                                                        | -        | 2.3  |
| Z0573                    | <i>hha</i>  | Haemolysin expression modulating protein, with Hns involved in transcriptional regulation of hemolysin                                                                      | -        | 2.2  |
| Z0574                    | <i>ybaJ</i> | Hypothetical protein                                                                                                                                                        | -        | 3.0  |
| <b>Z0609<sup>c</sup></b> | Z0609       | Unknown function                                                                                                                                                            | -        | 2.1  |
| Z1010                    | <i>ybhQ</i> | Hypothetical protein                                                                                                                                                        | -        | 3.2  |
| Z1062                    | Z1062       | Biofilm formation regulatory protein BssR.                                                                                                                                  | -        | 2.8  |
| Z1421                    | <i>agp</i>  | Periplasmic glucose-1-phosphatase                                                                                                                                           | -        | 2.1  |
| Z1671                    | <i>csgF</i> | Curli production assembly/transport component, 2nd curli operon                                                                                                             | -        | 15.8 |
| Z1672                    | <i>csgE</i> | Curli production assembly/transport component, 2nd curli operon                                                                                                             | -        | 11.2 |
| Z1675                    | <i>csgB</i> | Minor curlin subunit precursor, similar ro CsgA                                                                                                                             | -        | 97.5 |
| Z1676                    | <i>csgA</i> | Curlin major subunit, coiled surface structures; cryptic                                                                                                                    | -        | 93.4 |
| Z1677                    | <i>csgC</i> | Putative curli production protein                                                                                                                                           | -        | 8.1  |
| Z1678                    | Z1678       | Hypothetical protein                                                                                                                                                        | -        | 2.5  |
| Z1697                    | <i>yceP</i> | BssS; a regulator of biofilm through signal secretion;                                                                                                                      | -        | 2.7  |
| Z1939                    | <i>ycgJ</i> | Hypothetical protein                                                                                                                                                        | -        | 2.2  |
| Z1976                    | <i>ychH</i> | YchH; transcription activated by CRP (cyclic AMP receptor protein), a global transcription factor involved in regulation of metabolism in enteric bacteria                  | -        | 5.5  |
| Z2480                    | <i>pspB</i> | Phage shock protein, putative inner membrane protein (acts together with PspC to induce <i>psp</i> operon during infection with phage, exposure to ethanol or osmotic shock | -        | 2.2  |
| <b>Z2565</b>             | Z2565       | Putative chaperone protein, T3SS secreted effector EspM-like protein                                                                                                        | -        | 2.8  |
| Z2591                    | <i>asr</i>  | Required for growth and survival under moderately acid conditions                                                                                                           | -        | 2.8  |
| Z2703                    | Z2703       | Hypothetical protein                                                                                                                                                        | -        | 2.1  |
| Z2755                    | Z2755       | Hypothetical protein                                                                                                                                                        | -        | 2.8  |

|              |             |                                                                |   |     |
|--------------|-------------|----------------------------------------------------------------|---|-----|
| Z2853        | Z2853       | Hypothetical protein                                           | - | 2.2 |
| Z2869        | Z2869       | Hypothetical protein                                           | - | 3.4 |
| Z2945        | <i>flhC</i> | Regulator of flagellar biosynthesis acting on class 2 operons  | - | 2.8 |
| Z2946        | <i>flhD</i> | Regulator of flagellar biosynthesis, acting on class 2 operons | - | 3.8 |
| <b>Z3203</b> | <i>wzy</i>  | O antigen polymerase                                           | - | 2.4 |
| Z3642        | Z3642       | Hypothetical protein                                           | - | 2.4 |
| Z3970        | Z3970       | Hypothetical protein                                           | - | 2.1 |
| Z4041        | <i>ygbA</i> | Hypothetical protein                                           | - | 3.8 |
| <b>Z4326</b> | Z4326       | Putative enterotoxin                                           | - | 2.1 |
| Z4443        | <i>ygjV</i> | Hypothetical protein                                           | - | 2.0 |
| Z5525        | <i>yijD</i> | Hypothetical protein                                           | - | 2.9 |
| Z5795        | <i>yjfN</i> | Hypothetical protein                                           | - | 5.9 |
| Z5828        | <i>ytfK</i> | Hypothetical protein                                           | - | 2.7 |
| <b>Z6020</b> | <i>nleF</i> | Hypothetical protein                                           | - | 2.0 |
| <b>Z6025</b> | <i>nleG</i> | Unknown protein encoded by cryptic prophage CP-933P            | - | 2.2 |

<sup>a</sup>The COGs was assigned based on the annotation of *E. coli* O157:H7 strain EDL933. -: not available; <sup>b</sup>The ratio of normalized hybridization intensities of the gene in C<sup>+</sup> variant RM6607R to that of in the C<sup>-</sup> variant RM6607W. All genes listed here passed the significance test as detailed in the materials and method section. Genes in bold are *E. coli* O157:H7 specific genes. <sup>c</sup>The common up-regulated genes in both C<sup>+</sup> variants.

Table S3. Up-regulated genes in C<sup>-</sup> variant of *E. coli* O157:H7 strain RM6607

| ID           | Gene         | Product                                                                                    | COG <sup>a</sup> | Fold Change <sup>b</sup> |
|--------------|--------------|--------------------------------------------------------------------------------------------|------------------|--------------------------|
| Z0044        | <i>caiB</i>  | l-carnitine dehydratase                                                                    | COG1804C         | 2.2                      |
| Z1241        | <i>dmsB</i>  | Anaerobic dimethyl sulfoxide reductase subunit B                                           | COG0437C         | 2.2                      |
| Z3067        | <i>yodB</i>  | Putative cytochrome                                                                        | COG3038C         | 14.0                     |
| Z3747        | <i>hyfG</i>  | Hydrogenase 4 subunit                                                                      | COG3261C         | 2.5                      |
| Z4370        | <i>Z4370</i> | Hypothetical protein                                                                       | COG1032C         | 2.1                      |
| Z0099        | <i>ftsW</i>  | Cell division; membrane protein involved in shape determination                            | COG0772D         | 2.5                      |
| Z0037        | <i>carA</i>  | Carbamoyl-phosphate synthetase, glutamine (small) subunit                                  | COG0505EF        | 3.3                      |
| Z0038        | <i>carB</i>  | Carbamoyl-phosphate synthase large subunit                                                 | COG0458EF        | 3.6                      |
| Z0715        | <i>pheP</i>  | Phenylalanine-specific transport system                                                    | COG1113E         | 2.4                      |
| Z0752        | <i>ybdR</i>  | Putative oxidoreductase                                                                    | COG1063ER        | 5.9                      |
| Z1090        | <i>artJ</i>  | Arginine 3rd transport system periplasmic binding protein                                  | COG0834ET        | 4.3                      |
| Z2216        | <i>gadC</i>  | Acid sensitivity protein, putative transporter                                             | COG0531E         | 99.2                     |
| Z2793        | <i>gdhA</i>  | NADP-specific glutamate dehydrogenase                                                      | COG0334E         | 2.5                      |
| Z3176        | <i>yeeF</i>  | Putative amino acid/amine transport protein                                                | COG0531E         | 3.1                      |
| Z3182        | <i>hisD</i>  | L-histidinol:NAD <sup>+</sup> oxidoreductase; L-histidinol:NAD <sup>+</sup> oxidoreductase | COG0141E         | 2.2                      |
| Z3401        | <i>Z3401</i> | Putative oxidoreductase                                                                    | COG0493ER        | 3.2                      |
| Z4156        | <i>lysA</i>  | Diaminopimelate decarboxylase                                                              | COG0019E         | 3.9                      |
| Z4442        | <i>ygjU</i>  | Serine/threonine transporter SstT                                                          | COG3633E         | 2.9                      |
| Z4930        | <i>gadA</i>  | Glutamate decarboxylase isozyme                                                            | COG0076E         | 100.6                    |
| Z5516        | <i>argC</i>  | N-acetyl-gamma-glutamyl-phosphate reductase                                                | COG0002E         | 5.2                      |
| Z5517        | <i>argB</i>  | Acetylglutamate kinase                                                                     | COG0548E         | 2.4                      |
| Z3761        | <i>upp</i>   | Uracil phosphoribosyltransferase                                                           | COG0035F         | 6.4                      |
| Z3772        | <i>guaB</i>  | Inositol-5-monophosphate dehydrogenase                                                     | COG0516F         | 2.9                      |
| Z4299        | <i>yggV</i>  | Putative deoxyribonucleotide triphosphate pyrophosphatase                                  | COG0127F         | 2.1                      |
| Z3982        | <i>Z3982</i> | Putative transport protein                                                                 | COG2814G         | 2.5                      |
| Z4932        | <i>treF</i>  | Trehalase                                                                                  | COG1626G         | 2.6                      |
| Z0075        | <i>yabJ</i>  | Putative ATP-binding component of a transport system                                       | COG3840H         | 2.2                      |
| Z0526        | <i>yajK</i>  | Putative oxidoreductase                                                                    | COG0301H         | 2.2                      |
| Z3472        | <i>yojL</i>  | Thiamine biosynthesis lipoprotein ApbE                                                     | COG1477H         | 2.2                      |
| Z4300        | <i>yggW</i>  | Coproporphyrinogen III oxidase                                                             | COG0635H         | 2.3                      |
| Z3586        | <i>fabB</i>  | 3-oxoacyl-(acyl carrier protein) synthase I                                                | COG0304IQ        | 2.9                      |
| Z5794        | <i>aidB</i>  | Isovaleryl CoA dehydrogenase                                                               | COG1960I         | 3.1                      |
| Z1017        | <i>rhlE</i>  | Putative ATP-dependent RNA helicase                                                        | COG0513LKJ       | 4.5                      |
| Z1061        | <i>yliG</i>  | Orf, hypothetical protein                                                                  | COG0621J         | 2.4                      |
| Z4754        | <i>yrfH</i>  | Ribosome-associated heat shock protein Hsp15                                               | COG1188J         | 2.3                      |
| Z5809        | <i>rpsF</i>  | 30S ribosomal protein S6                                                                   | COG0360J         | 2.4                      |
| Z0067        | <i>Z0067</i> | Putative enzyme; Unknown function                                                          | COG0553KL        | 2.9                      |
| Z0376        | <i>ykgA</i>  | Putative AraC-like transcriptional regulator                                               | COG4977K         | 3.3                      |
| <b>Z1503</b> | <i>Z1503</i> | Unknown protein encoded by bacteriophage BP-933W                                           | COG3561K         | 3.5                      |
| Z3692        | <i>yfeT</i>  | Hypothetical protein                                                                       | COG1737K         | 65.9                     |
| Z4377        | <i>ygiX</i>  | DNA-binding transcriptional regulator QseB                                                 | COG0745TK        | 2.6                      |

|                          |              |                                                               |           |     |
|--------------------------|--------------|---------------------------------------------------------------|-----------|-----|
| Z4762                    | <i>yhgF</i>  | Hypothetical protein                                          | COG2183K  | 2.6 |
| <b>Z0307</b>             | <i>intH</i>  | Putative integrase for prophage CP-933H                       | COG4974L  | 2.9 |
| Z2536                    | <i>topA</i>  | DNA topoisomerase type I, omega protein                       | COG0550L  | 2.4 |
| Z4043                    | <i>mutS</i>  | DNA mismatch repair protein                                   | COG0249L  | 2.1 |
| Z4115                    | <i>exo</i>   | Exonuclease IX                                                | COG0258L  | 2.6 |
| Z5059                    | <i>mutM</i>  | Formamidopyrimidine-DNA glycosylase                           | COG0266L  | 3.6 |
| Z5191                    | <i>recF</i>  | Recombination protein F                                       | COG1195L  | 3.1 |
| Z3213                    | <i>cpsB</i>  | Mannose-1-phosphate guanyltransferase                         | COG0836M  | 2.2 |
| Z3217                    | <i>gmd</i>   | GDP-D-mannose dehydratase                                     | COG1089M  | 3.1 |
| Z3397                    | <i>yohK</i>  | Putative serotonin transporter                                | COG1346M  | 2.1 |
| Z3643                    | <i>ddg</i>   | Lipid A biosynthesis palmitoleoyl acyltransferase             | COG1560M  | 3.5 |
| Z4261                    | <i>yggB</i>  | Mechanosensitive channel MscS                                 | COG0668M  | 2.8 |
| Z3030                    | <i>fliH</i>  | Flagellar biosynthesis; export of flagellar proteins?         | COG1317NU | 2.1 |
| Z3033                    | <i>fliK</i>  | Flagellar hook-length control protein                         | COG3144N  | 2.4 |
| Z0014                    | <i>dnaK</i>  | Chaperone Hsp70; DNA biosynthesis; heat shock proteins        | COG0443O  | 3.0 |
| Z0015                    | <i>dnaJ</i>  | Chaperone with DnaK; heat shock protein                       | COG0484O  | 3.0 |
| Z0545                    | <i>lon</i>   | DNA-binding, ATP-dependent protease La; heat shock K-protein  | COG0466O  | 2.2 |
| Z0590                    | <i>htpG</i>  | Chaperone Hsp90, heat shock protein C 62.5                    | COG0326O  | 2.7 |
| Z0645                    | <i>ybbN</i>  | Putative thioredoxin-like protein                             | COG3118O  | 2.4 |
| Z1418                    | <i>cbpA</i>  | Curved DNA-binding protein; functions closely related to DnaJ | COG0484O  | 2.8 |
| Z3886                    | <i>clpB</i>  | Protein disaggregation chaperone                              | COG0542O  | 3.5 |
| Z3907                    | <i>grpE</i>  | Heat shock protein GrpE                                       | COG0576O  | 2.0 |
| Z4344                    | <i>hybG</i>  | Hydrogenase 2 accessory protein HypG                          | COG0298O  | 2.8 |
| Z4844                    | <i>yhhP</i>  | Cell developmental protein SirA                               | COG0425O  | 2.2 |
| Z5478                    | <i>hslU</i>  | ATP-dependent protease ATP-binding subunit                    | COG1220O  | 2.2 |
| Z5479                    | <i>hslV</i>  | ATP-dependent protease peptidase subunit                      | COG5405O  | 2.6 |
| Z5747                    | <i>groES</i> | Co-chaperonin GroES                                           | COG0234O  | 3.7 |
| Z5748                    | <i>groEL</i> | Chaperonin GroEL                                              | COG0459O  | 3.5 |
| Z5990                    | <i>sms</i>   | DNA repair protein RadA                                       | COG1066O  | 2.5 |
| Z0843                    | <i>kdpC</i>  | High-affinity potassium transport system                      | COG2156P  | 2.4 |
| <b>Z1921<sup>c</sup></b> | <i>Z1921</i> | Unknown protein encoded by prophage CP-933X                   | COG3546P  | 8.2 |
| Z2761                    | <i>katE</i>  | Catalase; hydroperoxidase HPII(III)                           | COG0753P  | 2.3 |
| Z3657                    | <i>Z3657</i> | Putative transport system permease                            | COG1914P  | 2.3 |
| Z4150                    | <i>Z4150</i> | Putative transport protein                                    | COG0861P  | 2.5 |
| Z4931                    | <i>yhjA</i>  | Putative cytochrome C peroxidase                              | COG1858P  | 3.2 |
| Z5217                    | <i>pstA</i>  | Phosphate transporter permease subunit                        | COG0581P  | 4.2 |
| Z5219                    | <i>pstS</i>  | Phosphate transporter subunit                                 | COG0226P  | 3.4 |
| Z0447                    | <i>mhpC</i>  | 2-hydroxy-6-ketono-2,4-dienedioic acid hydrolase              | COG0596R  | 2.9 |
| Z1044                    | <i>Z1044</i> | Hypothetical protein                                          | COG0561R  | 2.2 |
| Z1416                    | <i>torD</i>  | Part of trimethylamine-N-oxide oxidoreductase                 | COG3381R  | 3.7 |
| <b>Z1773<sup>c</sup></b> | <i>Z1773</i> | Unknown protein encoded by prophage CP-933N                   | COG5529R  | 2.5 |
| <b>Z2093</b>             | <i>Z2093</i> | Unknown protein encoded within prophage CP-933O               | COG5529R  | 2.1 |
| Z2458                    | <i>ycjX</i>  | Putative EC 2.1 enzymes                                       | COG3106R  | 3.7 |
| Z2653                    | <i>ydhA</i>  | Unknown function                                              | COG3895R  | 3.3 |



|                          |             |                                                             |             |      |
|--------------------------|-------------|-------------------------------------------------------------|-------------|------|
| Z2893                    | Z2893       | Unknown function                                            | COG0388R    | 5.4  |
| <b>Z3092</b>             | Z3092       | Unknown protein encoded within prophage CP-933U             | COG4397R    | 2.4  |
| <b>Z3124</b>             | Z3124       | Unknown protein encoded within prophage CP-933U             | COG5529R    | 2.3  |
| Z3239                    | Z3239       | Putative chaperonin                                         | COG4248R    | 2.5  |
| Z3396                    | <i>yohJ</i> | Hypothetical protein                                        | COG1380R    | 3.3  |
| Z4438                    | <i>ygiP</i> | Hypothetical protein                                        | COG1451R    | 3.5  |
| Z4753                    | <i>yrfG</i> | Putative phosphatase                                        | COG1011R    | 2.2  |
| Z4768                    | <i>yhgH</i> | Gluconate periplasmic binding protein                       | COG1040R    | 2.8  |
| <b>Z1457</b>             | Z1457       | Putative DNA-binding protein Roi of bacteriophage BP-933W   | COG3645S    | 2.1  |
| Z1752                    | <i>yefS</i> | Hypothetical protein                                        | COG1376S    | 3.5  |
| <b>Z1771<sup>c</sup></b> | Z1771       | Unknown protein encoded by prophage CP-933N                 | COG4197S    | 5.3  |
| <b>Z1922<sup>c</sup></b> | Z1922       | Unknown protein encoded by prophage CP-933X                 | COG3685S    | 9.6  |
| <b>Z1923<sup>c</sup></b> | Z1923       | Unknown protein encoded by prophage CP-933X                 | COG3685S    | 6.8  |
| Z2456                    | <i>ycjF</i> | Hypothetical protein                                        | COG3768S    | 2.5  |
| Z2554                    | <i>yciF</i> | Putative structural proteins                                | COG3685S    | 3.0  |
| Z2555                    | <i>yciE</i> | Hypothetical protein                                        | COG3685S    | 2.7  |
| Z2921                    | <i>yecE</i> | Hypothetical protein                                        | COG1801S    | 2.2  |
| Z3965                    | Z3965       | Hypothetical protein                                        | COG0401S    | 2.0  |
| Z4766                    | <i>yhgA</i> | Hypothetical protein                                        | COG5464S    | 2.1  |
| Z4920                    | <i>yhiD</i> | Putative Mg(2+) transport ATPase                            | COG1285S    | 5.3  |
| Z4923                    | <i>hdeD</i> | Acid-resistance membrane protein                            | COG3247S    | 70.6 |
| Z5628                    | <i>yjbA</i> | Phosphate-starvation-inducible protein PsiE                 | COG3223S    | 2.8  |
| Z2775                    | <i>spy</i>  | Periplasmic protein related to spheroblast formation        | COG3678UNTP | 2.8  |
| Z2948                    | <i>yecG</i> | Universal stress protein UspC                               | COG0589T    | 2.4  |
| Z4425                    | <i>aer</i>  | Aerotaxis sensor receptor, flavoprotein                     | COG0840NT   | 2.4  |
| Z5458                    | <i>yiiO</i> | Periplasmic repressor CpxP                                  | COG3678UNTP | 2.1  |
| Z0108                    | <i>secA</i> | Preprotein translocase; secretion protein                   | COG0653U    | 2.5  |
| Z0005                    | Z0005       | Hypothetical protein                                        | -           | 2.1  |
| Z0277                    | <i>ykfE</i> | Hypothetical protein                                        | -           | 3.2  |
| <b>Z0312</b>             | Z0312       | Partial O replication protein for prophage CP-933H          | -           | 2.1  |
| Z0475                    | Z0475       | Hypothetical protein                                        | -           | 6.3  |
| <b>Z0753<sup>c</sup></b> | Z0753       | Unknown function                                            | -           | 2.9  |
| <b>Z0951<sup>c</sup></b> | Z0951       | Putative exonuclease encoded by prophage CP-933K            | -           | 5.4  |
| <b>Z0952<sup>c</sup></b> | Z0952       | Putative Bet recombination protein of prophage CP-933K      | -           | 5.4  |
| Z1023                    | <i>ybiJ</i> | Hypothetical protein                                        | -           | 2.5  |
| Z1046m                   | Z1045       | Putative pyruvate formate-lyase 2                           | -           | 2.7  |
| <b>Z1201</b>             | Z1201       | Unknown function                                            | -           | 3.8  |
| <b>Z1335</b>             | Z1335       | Unknown protein encoded by cryptic prophage CP-933M         | -           | 2.3  |
| <b>Z1428<sup>c</sup></b> | Z1428       | Unknown protein encoded by bacteriophage BP-933W            | -           | 3.3  |
| <b>Z1429<sup>c</sup></b> | Z1429       | Unknown protein encoded by bacteriophage BP-933W            | -           | 5.2  |
| <b>Z1432</b>             | Z1432       | Unknown protein encoded by bacteriophage BP-933W            | -           | 4.4  |
| Z1435                    | <i>exoW</i> | Putative exonuclease of bacteriophage BP-933W               | -           | 4.7  |
| <b>Z1437<sup>c</sup></b> | <i>betW</i> | Putative Bet recombination protein of bacteriophage BP-933W | -           | 5.2  |
| <b>Z1440<sup>c</sup></b> | <i>ssbW</i> | Putative single-stranded DNA binding protein                | -           | 6.8  |

|                          |              |                                                                  |   |       |
|--------------------------|--------------|------------------------------------------------------------------|---|-------|
| <b>Z1464</b>             | <i>stx2A</i> | Shiga-like toxin II A subunit encoded by bacteriophage BP-933W   | - | 2.2   |
| <b>Z1471</b>             | <i>Z1471</i> | Putative antirepressor protein Ant of bacteriophage BP-933W      | - | 2.0   |
| <b>Z1501<sup>c</sup></b> | <i>Z1501</i> | Unknown protein encoded by bacteriophage BP-933W                 | - | 4.1   |
| Z1751                    | <i>ycfR</i>  | Hypothetical protein                                             | - | 3.3   |
| <b>Z1772</b>             | <i>Z1772</i> | Unknown protein encoded by prophage CP-933N                      | - | 2.3   |
| <b>Z1776</b>             | <i>Z1776</i> | Unknown protein encoded by prophage CP-933N                      | - | 2.5   |
| <b>Z1777<sup>c</sup></b> | <i>Z1777</i> | Unknown protein encoded by prophage CP-933N                      | - | 2.8   |
| Z1868                    | <i>Z1868</i> | Putative replication protein O of prophage CP-933X               | - | 2.1   |
| <b>Z1869<sup>c</sup></b> | <i>Z1869</i> | Putative replication protein P of prophage CP-933X               | - | 2.4   |
| <b>Z2049</b>             | <i>Z2049</i> | Unknown protein encoded by prophage CP-933O                      | - | 2.1   |
| <b>Z2092</b>             | <i>Z2092</i> | Unknown protein encoded within prophage CP-933O                  | - | 2.4   |
| Z2229                    | <i>Z2229</i> | Biofilm-dependent modulation protein                             | - | 12.2  |
| Z2631                    | <i>Z2631</i> | <i>oriC</i> -binding nucleoid-associated protein                 | - | 5.0   |
| Z2632                    | <i>Z2632</i> | Hypothetical protein                                             | - | 2.1   |
| Z2958                    | <i>Z2958</i> | Hypothetical protein                                             | - | 2.6   |
| <b>Z3088</b>             | <i>Z3088</i> | Putative tail fiber component U of prophage CP-933U              | - | 2.4   |
| <b>Z3125</b>             | <i>Z3125</i> | Unknown protein encoded within prophage CP-933U                  | - | 2.2   |
| <b>Z3349</b>             | <i>Z3349</i> | Putative DNA methyltransferase encoded within prophage CP-933V   | - | 2.1   |
| <b>Z3355<sup>c</sup></b> | <i>Z3355</i> | Putative DNA replication protein P of prophage CP-933V           | - | 2.1   |
| <b>Z3363<sup>c</sup></b> | <i>Z3363</i> | Putative single-stranded DNA binding protein of prophage CP-933V | - | 5.4   |
| <b>Z3366<sup>c</sup></b> | <i>Z3366</i> | Putative recombination protein Bet of prophage CP-933V           | - | 4.5   |
| <b>Z3367<sup>c</sup></b> | <i>Z3367</i> | Putative exonuclease of prophage CP-933V                         | - | 4.6   |
| <b>Z3370<sup>c</sup></b> | <i>Z3370</i> | Unknown protein encoded within prophage CP-933V                  | - | 3.2   |
| <b>Z3371<sup>c</sup></b> | <i>Z3371</i> | Unknown protein encoded within prophage CP-933V                  | - | 2.9   |
| <b>Z3372<sup>c</sup></b> | <i>Z3372</i> | Unknown protein encoded within prophage CP-933V                  | - | 2.5   |
| Z3516                    | <i>Z3516</i> | Hypothetical protein                                             | - | 2.0   |
| Z3585                    | <i>Z3585</i> | Transport                                                        | - | 2.3   |
| Z3656                    | <i>Z3656</i> | Hypothetical protein                                             | - | 2.9   |
| Z3722                    | <i>Z3722</i> | Hypothetical protein                                             | - | 7.1   |
| Z4126                    | <i>Z4126</i> | Hypothetical protein                                             | - | 4.3   |
| Z4286                    | <i>yqgD</i>  | Hypothetical protein                                             | - | 2.8   |
| Z4890                    | <i>yhiM</i>  | Inner membrane protein, acid resistance protein                  | - | 101.1 |
| Z4921                    | <i>hdeB</i>  | Acid-resistance protein                                          | - | 100.8 |
| Z4922                    | <i>hdeA</i>  | Acid-resistance protein                                          | - | 83.2  |
| Z5694                    | <i>Z5694</i> | Hypothetical protein                                             | - | 4.0   |
| <b>Z6071</b>             | <i>Z6071</i> | Unknown protein encoded by cryptic prophage CP-933P              | - | 2.3   |

<sup>a</sup>The COGs was assigned based on the annotation of *E. coli* O157:H7 strain EDL933. “-” stands for COG group is not available. <sup>b</sup>The ratio of normalized hybridization intensities of the gene in C<sup>-</sup> variant RM6607W to that of in the C<sup>+</sup> variant RM6607R. All genes listed here passed the significance test as detailed in the materials and method section. Genes in bold are *E. coli* O157:H7 specific genes. <sup>c</sup>The common up-regulated genes in both C<sup>+</sup> variants.

Table S4. Up-regulated genes in C<sup>+</sup> variant of *E. coli* O157:H7 strain RM6608

| ID           | Gene        | Product                                                                           | COG <sup>a</sup> | Fold Change <sup>b</sup> |
|--------------|-------------|-----------------------------------------------------------------------------------|------------------|--------------------------|
| Z0072        | <i>araB</i> | L-ribulokinase                                                                    | COG1069C         | 4.1                      |
| Z0672        | <i>ylbC</i> | putative malate dehydrogenase (EC 1.1.1.37)                                       | COG2055C         | 2.0                      |
| Z1106        | Z1106       | putative enzyme                                                                   | COG1018C         | 3.3                      |
| Z2235        | <i>fdnH</i> | formate dehydrogenase-N, nitrate-inducible, iron-sulfur beta subunit              | COG0437C         | 2.1                      |
| Z2275        | Z2275       | putative aldehyde dehydrogenase                                                   | COG1012C         | 3.1                      |
| Z2577        | Z2577       | putative oxidoreductase, Fe-S subunit                                             | COG0437C         | 2.3                      |
| Z2702        | Z2702       | putative oxidoreductase, Fe-S subunit                                             | COG0437C         | 2.2                      |
| Z2726        | <i>ydiQ</i> | putative transport protein                                                        | COG2086C         | 3.3                      |
| Z3633        | <i>yfdE</i> | orf; Unknown function                                                             | COG1804C         | 2.7                      |
| Z3828        | <i>hmpA</i> | nitric oxide dioxygenase                                                          | COG1018C         | 3.0                      |
| Z4354        | Z4354       | aldo-keto reductase                                                               | COG0667C         | 2.0                      |
| Z4434        | <i>yglL</i> | putative NADPH dehydrogenase                                                      | COG1902C         | 7.6                      |
| Z5435        | <i>fdoH</i> | formate dehydrogenase-O, iron-sulfur subunit                                      | COG0437C         | 2.3                      |
| Z0562        | <i>glnK</i> | nitrogen regulatory protein P-II 2                                                | COG0347E         | 2.0                      |
| Z1056        | Z1056       | putative transport system permease protein                                        | COG1173EP        | 2.7                      |
| Z1832        | <i>pepT</i> | putative peptidase T                                                              | COG2195E         | 2.5                      |
| Z2276        | Z2276       | putative transport system permease protein                                        | COG1177E         | 3.0                      |
| Z2277        | Z2277       | putative transport system permease protein                                        | COG1176E         | 2.2                      |
| Z2278        | Z2278       | putative ATP-binding component of a transport system                              | COG3842E         | 3.0                      |
| Z2279        | Z2279       | putative transport protein                                                        | COG0687E         | 5.3                      |
| Z2592        | Z2592       | orf, hypothetical protein                                                         | COG3591E         | 2.2                      |
| Z3637        | Z3637       | putative oxalyl-CoA decarboxylase                                                 | COG0028EH        | 2.8                      |
| Z4211        | <i>ygeY</i> | peptidase                                                                         | COG0624E         | 5.4                      |
| Z4217        | Z4217       | putative selenate reductase subunit YgfK                                          | COG0493ER        | 2.1                      |
| Z4463        | <i>yhaO</i> | putative transport system permease protein                                        | COG0814E         | 3.8                      |
| Z4826        | <i>livM</i> | leucine/isoleucine/valine transporter permease subunit                            | COG4177E         | 2.5                      |
| Z5744        | <i>aspA</i> | aspartate ammonia-lyase                                                           | COG1027E         | 3.1                      |
| Z0805        | <i>ybeJ</i> | putative periplasmic binding transport protein                                    | COG0834ET        | 2.8                      |
| Z3010        | <i>fliY</i> | putative periplasmic binding transport protein                                    | COG0834ET        | 5.6                      |
| Z3571        | <i>hisJ</i> | histidine-binding periplasmic protein of high-affinity histidine transport system | COG0834ET        | 2.5                      |
| Z3572        | <i>argT</i> | lysine-, arginine-, ornithine-binding periplasmic protein                         | COG0834ET        | 3.6                      |
| Z0427        | <i>prpB</i> | putative phosphonmutase 2                                                         | COG2513G         | 2.1                      |
| Z0826        | <i>nagE</i> | PTS system, N-acetylglucosamine-specific enzyme IIABC                             | COG1263G         | 2.6                      |
| Z1109        | <i>aqpZ</i> | transmembrane water channel; aquaporin Z                                          | COG0580G         | 2.6                      |
| Z1314        | <i>mgsA</i> | methylglyoxal synthase                                                            | COG1803G         | 2.5                      |
| Z1968        | <i>treA</i> | trehalase, periplasmic                                                            | COG1626G         | 2.0                      |
| Z2191        | <i>ydeY</i> | putative transport system permease protein                                        | COG1172G         | 2.3                      |
| Z2590        | <i>ynfM</i> | putative transport protein                                                        | COG2814G         | 6.3                      |
| <b>Z3394</b> | Z3394       | putative transporter                                                              | COG2271G         | 2.1                      |
| Z3427        | <i>fruB</i> | bifunctional fructose-specific PTS IIA/HPr protein                                | COG4668G         | 2.7                      |
| Z3431        | <i>yeiQ</i> | putative oxidoreductase                                                           | COG0246G         | 4.9                      |

|              |             |                                                                |            |     |
|--------------|-------------|----------------------------------------------------------------|------------|-----|
| Z3683        | <i>crr</i>  | glucose-specific PTS system component                          | COG2190G   | 2.1 |
| Z3807        | <i>hcaT</i> | putative 3-phenylpropionic acid transporter                    | COG2814G   | 2.7 |
| Z4023        | <i>ascF</i> | cellobiose/arbutin/salicin-specific PTS system components IIBC | COG1263G   | 2.1 |
| Z4444        | <i>uxaA</i> | altronate hydrolase                                            | COG2721G   | 2.3 |
| Z4822        | <i>ugpB</i> | glycerol-3-phosphate transporter periplasmic binding protein   | COG1653G   | 2.5 |
| Z5417        | <i>yihS</i> | hypothetical protein                                           | COG2942G   | 2.1 |
| Z5447        | <i>rhaA</i> | L-rhamnose isomerase                                           | COG4806G   | 3.5 |
| Z5633        | <i>malK</i> | maltose/maltodextrin transporter ATP-binding protein           | COG3839G   | 3.6 |
| Z5839        | Z5839       | putative ATP-binding component of ABC transporter              | COG1129G   | 2.1 |
| Z5920        | <i>uxuA</i> | mannonate dehydratase                                          | COG1312G   | 2.1 |
| Z0993        | <i>bioA</i> | 7,8-diaminopelargonic acid synthetase                          | COG0161H   | 2.0 |
| Z1000        | <i>moaA</i> | molybdopterin biosynthesis, protein A                          | COG2896H   | 2.1 |
| Z0278        | <i>yafH</i> | putative acyl-CoA dehydrogenase (EC 1.3.99.-)                  | COG1960I   | 7.9 |
| <b>Z1549</b> | Z1549       | putative beta-ketoacyl-[acyl carrier protein] synthase         | COG0304IQ  | 2.7 |
| Z2848        | <i>fadD</i> | acyl-CoA synthetase, long-chain-fatty-acid--CoA ligase         | COG0318IQ  | 7.9 |
| Z3604        | Z3604       | multifunctional fatty acid oxidation complex subunit alpha     | COG1250I   | 3.4 |
| Z3605        | Z3605       | 3-ketoacyl-CoA thiolase                                        | COG0183I   | 4.2 |
| Z3608        | <i>fadL</i> | long-chain fatty acid outer membrane transporter               | COG2067I   | 4.3 |
| Z3691        | <i>ucpA</i> | short chain dehydrogenase                                      | COG1028IQR | 3.4 |
| Z3813        | <i>hcaB</i> | 2,3-dihydroxy-2,3-dihydrophenylpropionate dehydrogenase        | COG1028IQR | 2.2 |
| Z5366        | <i>fadA</i> | 3-ketoacyl-CoA thiolase                                        | COG0183I   | 5.2 |
| Z5367        | <i>fadB</i> | multifunctional fatty acid oxidation complex subunit alpha     | COG1250I   | 5.7 |
| Z5668        | <i>acs</i>  | acetyl-CoA synthetase                                          | COG0365I   | 3.6 |
| Z1509        | Z1509       | orf, hypothetical protein                                      | COG0251J   | 2.1 |
| Z3890        | <i>yfiA</i> | translation inhibitor protein RaiA                             | COG1544J   | 2.7 |
| Z4657        | <i>def</i>  | peptide deformylase                                            | COG0242J   | 2.2 |
| Z0201        | <i>yaeO</i> | orf, hypothetical protein                                      | COG4568K   | 2.6 |
| Z0426        | <i>prpR</i> | regulator for prp operon                                       | COG3829KT  | 2.4 |
| <b>Z0463</b> | Z0463       | putative response regulator; hexosephosphate transport         | COG2197TK  | 3.2 |
| Z1117        | <i>cspD</i> | cold shock protein                                             | COG1278K   | 2.5 |
| <b>Z1531</b> | Z1531       | putative regulator; Not classified                             | COG3710K   | 2.4 |
| Z2479        | <i>pspC</i> | phage shock protein: activates phage shock-protein expression  | COG1983KT  | 2.7 |
| Z2589        | <i>ynfL</i> | putative transcriptional regulator LYSR-type                   | COG0583K   | 2.4 |
| Z2874        | Z2874       | putative regulator                                             | COG1414K   | 2.6 |
| Z3804        | <i>csiE</i> | stationary phase inducible protein CsiE                        | COG3711K   | 3.3 |
| Z4208        | <i>ygeV</i> | putative transcriptional regulator                             | COG3829KT  | 4.6 |
| Z4435        | <i>ygjM</i> | hypothetical protein                                           | COG5499K   | 2.6 |
| Z4470        | <i>tdcA</i> | DNA-binding transcriptional activator TdcA                     | COG0583K   | 3.5 |
| Z5524        | <i>yijC</i> | DNA-binding transcriptional repressor FabR                     | COG1309K   | 2.3 |
| Z5661        | <i>soxS</i> | DNA-binding transcriptional regulator SoxS                     | COG2207K   | 2.9 |

|              |             |                                                                                     |           |     |
|--------------|-------------|-------------------------------------------------------------------------------------|-----------|-----|
| <b>Z5684</b> | Z5684       | putative transcriptional regulator                                                  | COG0745TK | 4.0 |
| Z5957        | <i>yjjM</i> | hypothetical protein                                                                | COG1802K  | 3.5 |
| Z0285        | <i>dinJ</i> | damage-inducible protein J                                                          | COG3077L  | 2.9 |
| Z1871        | Z1871       | unknown protein encoded by prophage CP-933X                                         | COG1961L  | 3.0 |
| Z2741        | <i>himA</i> | integration host factor (IHF), alpha subunit; site specific recombination           | COG0776L  | 2.6 |
| Z4656        | <i>smf</i>  | hypothetical protein                                                                | COG0758LU | 2.4 |
| Z0272        | Z0272       | orf; Unknown function (Rhs Element Associated)                                      | COG3209M  | 2.1 |
| <b>Z0608</b> | Z0608       | putative outer membrane export protein                                              | COG1538MU | 2.2 |
| Z1524        | <i>ycdQ</i> | orf, hypothetical protein                                                           | COG1215M  | 2.0 |
| Z2222        | Z2222       | orf, hypothetical protein                                                           | COG2173M  | 2.0 |
| Z2437        | Z2437       | orf, hypothetical protein                                                           | COG0668M  | 2.3 |
| Z4908        | <i>slp</i>  | outer membrane protein induced after carbon starvation                              | COG3065M  | 2.4 |
| Z0291        | <i>mbhA</i> | putative motility protein                                                           | COG1360N  | 2.3 |
| Z1292        | Z1292       | putative fimbrial-like protein                                                      | COG3539NU | 4.2 |
| Z3599        | <i>yfcS</i> | putative fimbrial chaperone                                                         | COG3121NU | 3.3 |
| Z5913        | <i>fimI</i> | fimbrial protein                                                                    | COG3539NU | 3.9 |
| Z0642        | <i>ybbK</i> | putative protease                                                                   | COG0330O  | 3.0 |
| Z4280        | <i>yggG</i> | hypothetical protein                                                                | COG0501O  | 2.0 |
| Z2477        | <i>pspE</i> | phage shock protein                                                                 | COG0607P  | 2.4 |
| Z3553        | <i>yfbS</i> | putative transport protein                                                          | COG0471P  | 2.1 |
| Z4441        | <i>ygiT</i> | putative transport protein                                                          | COG0861P  | 2.0 |
| Z5825        | <i>cysQ</i> | PAPS (adenosine 3'-phosphate 5'-phosphosulfate) 3'(2'),5'-bisphosphate nucleotidase | COG1218P  | 2.6 |
| <b>Z3392</b> | Z3392       | putative isomerase-decarboxylase                                                    | COG0179Q  | 2.1 |
| <b>Z3393</b> | Z3393       | putative 1,2-dioxygenase                                                            | COG3435Q  | 2.1 |
| Z0157        | <i>sfsA</i> | sugar fermentation stimulation protein A                                            | COG1489R  | 2.7 |
| Z0670        | <i>ylbA</i> | orf, hypothetical protein                                                           | COG3257R  | 3.4 |
| Z2251        | Z2251       | orf; Unknown function                                                               | COG1853R  | 2.3 |
| Z2665        | Z2665       | orf, hypothetical protein                                                           | COG3313R  | 2.8 |
| Z3239        | Z3239       | putative chaperonin                                                                 | COG4248R  | 2.2 |
| Z4216        | <i>ygfJ</i> | hypothetical protein                                                                | COG2068R  | 3.3 |
| <b>Z5153</b> | Z5153       | hypothetical protein                                                                | COG2252R  | 2.0 |
| Z5666        | <i>yjcG</i> | acetate permease                                                                    | COG4147R  | 2.5 |
| Z5743        | <i>dcuA</i> | anaerobic C4-dicarboxylate transporter                                              | COG2704R  | 2.3 |
| Z5827        | <i>ytfJ</i> | hypothetical protein                                                                | COG3054R  | 2.6 |
| <b>Z0414</b> | Z0414       | orf; Unknown function                                                               | COG4405S  | 2.4 |
| Z1315        | Z1315       | orf, hypothetical protein                                                           | COG3110S  | 4.3 |
| Z2292        | <i>ydcH</i> | orf; Unknown function                                                               | COG2841S  | 5.1 |
| Z4462        | Z4462       | hypothetical protein                                                                | COG3681S  | 3.3 |
| Z4655        | <i>smg</i>  | hypothetical protein                                                                | COG2922S  | 2.6 |
| Z5667        | <i>yjcH</i> | hypothetical protein                                                                | COG3162S  | 3.3 |
| Z5867        | <i>yjgD</i> | hypothetical protein                                                                | COG3076S  | 2.4 |
| Z0156        | <i>dksA</i> | dnaK suppressor protein                                                             | COG1734T  | 3.5 |
| Z0481        | <i>adrA</i> | diguanylate cyclase AdrA                                                            | COG2199T  | 5.1 |
| Z0740        | <i>cstA</i> | carbon starvation protein                                                           | COG1966T  | 2.8 |

|              |             |                                                                 |          |       |
|--------------|-------------|-----------------------------------------------------------------|----------|-------|
| Z0751        | <i>ybdQ</i> | orf, hypothetical protein                                       | COG0589T | 3.4   |
| Z1024        | <i>ybiI</i> | orf, hypothetical protein                                       | COG1734T | 2.9   |
| Z1058        | Z1058       | orf, hypothetical protein                                       | COG2199T | 2.6   |
| Z1522        | <i>phoH</i> | PhoB-dependent, ATP-binding pho regulon component               | COG1702T | 3.2   |
| <b>Z1528</b> | Z1528       | orf; Unknown function                                           | COG2200T | 3.2   |
| Z2421        | Z2421       | orf, hypothetical protein                                       | COG2199T | 3.9   |
| Z5158        | <i>uhpB</i> | sensory histidine kinase UhpB                                   | COG3851T | 2.4   |
| Z5953        | <i>yjiY</i> | putative carbon starvation protein                              | COG1966T | 2.6   |
| <b>L7032</b> | <i>etpC</i> |                                                                 | COG3031U | 2.1   |
| Z3695        | Z3695       | hypothetical protein                                            | COG1680V | 2.1   |
| Z0065        | Z0065       | orf; Unknown function                                           | -        | 2.9   |
| Z0425        | <i>yahO</i> | orf, hypothetical protein                                       | -        | 3.3   |
| Z0480        | <i>psiF</i> | induced by phosphate starvation                                 | -        | 2.4   |
| Z0574        | <i>ybaJ</i> | orf, hypothetical protein                                       | -        | 2.9   |
| <b>Z0609</b> | Z0609       | orf; Unknown function                                           | -        | 3.2   |
| Z0846        | <i>ybfA</i> | orf, hypothetical protein                                       | -        | 2.4   |
| Z1010        | <i>ybhQ</i> | orf, hypothetical protein                                       | -        | 2.9   |
| Z1062        | Z1062       | biofilm formation regulatory protein BssR                       | -        | 2.8   |
| <b>Z1530</b> | Z1530       | orf; Unknown function                                           | -        | 2.3   |
| Z1672        | <i>csgE</i> | curli production assembly/transport component, 2nd curli operon | -        | 2.4   |
| Z1675        | <i>csgB</i> | minor curlin subunit precursor, similar to CsgA                 | -        | 108.2 |
| Z1676        | <i>csgA</i> | curlin major subunit, coiled surface structures                 | -        | 60.2  |
| Z1677        | <i>csgC</i> | putative curli production protein                               | -        | 5.0   |
| Z1678        | Z1678       | orf, hypothetical protein                                       | -        | 2.4   |
| Z1697        | <i>yceP</i> | biofilm formation regulatory protein BssS                       | -        | 3.0   |
| <b>Z1919</b> | Z1919       | unknown protein encoded by prophage CP-933X                     | -        | 2.4   |
| Z2301        | Z2301       | orf, hypothetical protein                                       | -        | 2.2   |
| <b>Z2360</b> | Z2360       | putative capsid protein of prophage CP-933R                     | -        | 2.4   |
| Z2478        | <i>pspD</i> | peripheral inner membrane phage-shock protein                   | -        | 2.4   |
| Z2755        | Z2755       | orf, hypothetical protein                                       | -        | 2.5   |
| Z2869        | Z2869       | orf, hypothetical protein                                       | -        | 2.1   |
| Z3050        | <i>yedA</i> | putative transmembrane subunit                                  | -        | 7.4   |
| Z3440        | <i>yejG</i> | hypothetical protein                                            | -        | 2.7   |
| Z3642        | Z3642       | hypothetical protein                                            | -        | 4.7   |
| Z3970        | Z3970       | hypothetical protein                                            | -        | 2.1   |
| Z4041        | <i>ygbA</i> | hypothetical protein                                            | -        | 2.4   |
| Z4215        | Z4215       | hypothetical protein                                            | -        | 2.0   |
| Z4894        | <i>yhiO</i> | universal stress protein UspB                                   | -        | 2.6   |
| <b>Z5094</b> | Z5094       | hypothetical protein                                            | -        | 2.0   |
| Z5525        | <i>yijD</i> | hypothetical protein                                            | -        | 2.9   |
| Z5648        | <i>yjbO</i> | phage shock protein G                                           | -        | 2.0   |
| Z5795        | <i>yjfN</i> | hypothetical protein                                            | -        | 7.0   |
| Z5828        | <i>ytfK</i> | hypothetical protein                                            | -        | 3.4   |

<sup>a</sup>The COGs was assigned based on the annotation of *E. coli* O157:H7 strain EDL933. -: COG group is not available; <sup>b</sup>The ratio of normalized hybridization intensities of the gene in C<sup>+</sup> variant RM6608R to that of in the C<sup>-</sup> variant RM6608W. All genes listed here passed the significance test as detailed in the materials and method section. Genes in bold are *E. coli* O157:H7 specific genes.

Table S5. Up-regulated genes in C<sup>-</sup> variant of *E. coli* O157:H7 strain RM6608

| ID    | Gene        | Product                                                                                                        | COG <sup>a</sup> | Fold Change <sup>b</sup> |
|-------|-------------|----------------------------------------------------------------------------------------------------------------|------------------|--------------------------|
| Z0880 | <i>sucA</i> | 2-oxoglutarate dehydrogenase (decarboxylase component)                                                         | COG0567C         | 2.2                      |
| Z0881 | <i>sucB</i> | 2-oxoglutarate dehydrogenase (dihydrolipoyltranssuccinase E2 component)                                        | COG0508C         | 2.8                      |
| Z0882 | <i>sucC</i> | succinyl-CoA synthetase, beta subunit                                                                          | COG0045C         | 2.9                      |
| Z0883 | <i>sucD</i> | succinyl-CoA synthetase, alpha subunit                                                                         | COG0074C         | 3.3                      |
| Z2633 | Z2633       | orf, hypothetical protein                                                                                      | COG4657C         | 2.3                      |
| Z2715 | <i>ydiJ</i> | putative oxidase                                                                                               | COG0277C         | 2.1                      |
| Z3067 | <i>yodB</i> | putative cytochrome                                                                                            | COG3038C         | 6.6                      |
| Z4370 | Z4370       | hypothetical protein                                                                                           | COG1032C         | 2.1                      |
| Z4612 | <i>yhdH</i> | putative dehydrogenase                                                                                         | COG0604CR        | 4.0                      |
| Z5230 | <i>atpD</i> | F0F1 ATP synthase subunit beta                                                                                 | COG0055C         | 3.3                      |
| Z5233 | <i>atpH</i> | F0F1 ATP synthase subunit delta                                                                                | COG0712C         | 5.3                      |
| Z5234 | <i>atpF</i> | F0F1 ATP synthase subunit B                                                                                    | COG0711C         | 3.1                      |
| Z5236 | <i>atpB</i> | F0F1 ATP synthase subunit A                                                                                    | COG0356C         | 2.8                      |
| Z5238 | <i>atpI</i> | F0F1 ATP synthase subunit I                                                                                    | COG3312C         | 2.6                      |
| Z0099 | <i>ftsW</i> | cell division; membrane protein involved in shape determination                                                | COG0772D         | 2.0                      |
| Z4610 | <i>mreB</i> | regulator of ftsI, penicillin binding protein 3, septation function                                            | COG1077D         | 3.2                      |
| Z5241 | <i>gidA</i> | tRNA uridine 5-carboxymethylaminomethyl modification enzyme GidA                                               | COG0445D         | 2.4                      |
| Z0002 | <i>thrA</i> | aspartokinase I, homoserine dehydrogenase I                                                                    | COG0527E         | 2.2                      |
| Z0037 | <i>carA</i> | carbamoyl-phosphate synthetase, glutamine (small) subunit                                                      | COG0505EF        | 7.3                      |
| Z0038 | <i>carB</i> | carbamoyl-phosphate synthase large subunit                                                                     | COG0458EF        | 4.9                      |
| Z0752 | <i>ybdR</i> | putative oxidoreductase                                                                                        | COG1063ER        | 6.8                      |
| Z1253 | <i>serC</i> | 3-phosphoserine aminotransferase                                                                               | COG1932HE        | 2.0                      |
| Z1275 | <i>aspC</i> | aspartate aminotransferase                                                                                     | COG1448E         | 3.2                      |
| Z1763 | <i>potC</i> | spermidine/putrescine transport system permease                                                                | COG1177E         | 2.6                      |
| Z1978 | <i>prsA</i> | phosphoribosylpyrophosphate synthetase                                                                         | COG0462FE        | 3.6                      |
| Z2216 | <i>gadC</i> | acid sensitivity protein, putative transporter                                                                 | COG0531E         | 92.9                     |
| Z3176 | <i>yeeF</i> | putative amino acid/amine transport protein                                                                    | COG0531E         | 7.3                      |
| Z3185 | <i>hisH</i> | glutamine amidotransferase subunit of heterodimer with HisF = imidazole glycerol phosphate synthase holoenzyme | COG0118E         | 2.3                      |
| Z3827 | <i>glyA</i> | serine hydroxymethyltransferase                                                                                | COG0112E         | 2.8                      |
| Z4930 | <i>gadA</i> | glutamate decarboxylase isozyme                                                                                | COG0076E         | 106.0                    |
| Z5164 | <i>ilvN</i> | acetolactate synthase I regulatory subunit                                                                     | COG0440E         | 3.7                      |
| Z5165 | <i>ilvB</i> | acetolactate synthase catalytic subunit                                                                        | COG0028EH        | 2.4                      |
| Z0299 | <i>gpt</i>  | guanine-hypoxanthine phosphoribosyltransferase                                                                 | COG0503F         | 2.2                      |
| Z0586 | <i>apt</i>  | adenine phosphoribosyltransferase                                                                              | COG0503F         | 2.1                      |
| Z0591 | <i>adk</i>  | adenylate kinase activity; pleiotropic effects on glycerol-3-phosphate acyltransferase activity                | COG0563F         | 5.7                      |
| Z3234 | <i>udk</i>  | uridine/cytidine kinase                                                                                        | COG0572F         | 2.8                      |

|       |             |                                                                                         |            |     |
|-------|-------------|-----------------------------------------------------------------------------------------|------------|-----|
| Z3489 | <i>nrdA</i> | ribonucleotide-diphosphate reductase subunit alpha                                      | COG0209F   | 2.2 |
| Z3491 | <i>nrdB</i> | ribonucleotide-diphosphate reductase subunit beta                                       | COG0208F   | 2.0 |
| Z3574 | <i>purF</i> | amidophosphoribosyltransferase                                                          | COG0034F   | 2.1 |
| Z3761 | <i>upp</i>  | uracil phosphoribosyltransferase                                                        | COG0035F   | 4.8 |
| Z3771 | <i>guaA</i> | bifunctional GMP synthase/glutamine<br>amidotransferase protein                         | COG0519F   | 3.4 |
| Z3772 | <i>guaB</i> | inositol-5-monophosphate dehydrogenase                                                  | COG0516F   | 3.6 |
| Z3781 | <i>ndk</i>  | nucleoside diphosphate kinase                                                           | COG0105F   | 2.7 |
| Z4144 | <i>thyA</i> | thymidylate synthase                                                                    | COG0207F   | 2.8 |
| Z4299 | <i>yggV</i> | putative deoxyribonucleotide triphosphate<br>pyrophosphatase                            | COG0127F   | 2.2 |
| Z5064 | <i>dut</i>  | deoxyuridine 5'-triphosphate nucleotidohydrolase                                        | COG0756F   | 2.1 |
| Z0837 | <i>pgm</i>  | phosphoglucomutase                                                                      | COG0033G   | 2.2 |
| Z2304 | <i>gapC</i> | glyceraldehyde-3-phosphate dehydrogenase                                                | COG0057G   | 2.7 |
| Z2949 | <i>otsA</i> | trehalose-6-phosphate synthase                                                          | COG0380G   | 2.3 |
| Z3260 | Z3260       | orf, hypothetical protein                                                               | COG1830G   | 2.5 |
| Z4790 | <i>glgP</i> | glycogen phosphorylase                                                                  | COG0058G   | 2.1 |
| Z4932 | <i>treF</i> | trehalase                                                                               | COG1626G   | 2.1 |
| Z0524 | <i>ispA</i> | geranyltranstransferase (farnesyl<br>diphosphate synthase)                              | COG0142H   | 2.6 |
| Z0526 | <i>yajK</i> | putative oxidoreductase                                                                 | COG0301H   | 2.2 |
| Z0775 | <i>lipB</i> | lipoate biosynthesis protein B                                                          | COG0321H   | 2.3 |
| Z3409 | <i>folE</i> | GTP cyclohydrolase I                                                                    | COG0302H   | 2.2 |
| Z4287 | <i>metK</i> | S-adenosylmethionine synthetase                                                         | COG0192H   | 2.1 |
| Z5063 | <i>dfp</i>  | bifunctional phosphopantothenoylecysteine<br>decarboxylase/phosphopantothenate synthase | COG0452H   | 2.5 |
| Z1734 | <i>fabF</i> | 3-oxoacyl-[acyl-carrier-protein] synthase II                                            | COG0304IQ  | 2.2 |
| Z1979 | <i>yehB</i> | orf, hypothetical protein                                                               | COG1947I   | 2.7 |
| Z3586 | <i>fabB</i> | 3-oxoacyl-(acyl carrier protein) synthase I                                             | COG0304IQ  | 2.1 |
| Z4615 | <i>accB</i> | acetyl-CoA carboxylase biotin carboxyl carrier protein<br>subunit                       | COG0511I   | 2.6 |
| Z0154 | <i>pcnB</i> | poly(A) polymerase I                                                                    | COG0617J   | 2.1 |
| Z0180 | <i>rpsB</i> | 30S ribosomal subunit protein S2                                                        | COG0052J   | 3.8 |
| Z0181 | <i>tsf</i>  | protein chain elongation factor EF-Ts                                                   | COG0264J   | 3.8 |
| Z0206 | <i>proS</i> | proline tRNA synthetase                                                                 | COG0442J   | 2.0 |
| Z0505 | <i>tgt</i>  | tRNA-guanine transglycosylase                                                           | COG0343J   | 2.1 |
| Z1017 | <i>rhIE</i> | putative ATP-dependent RNA helicase                                                     | COG0513LKJ | 2.4 |
| Z1228 | <i>infA</i> | protein chain initiation factor IF-1                                                    | COG0361J   | 3.5 |
| Z1257 | <i>rpsA</i> | 30S ribosomal subunit protein S1                                                        | COG0539J   | 2.2 |
| Z1974 | <i>yehF</i> | putative GTP-binding protein                                                            | COG0012J   | 2.5 |
| Z1982 | <i>prfA</i> | peptide chain release factor RF-1                                                       | COG0216J   | 3.1 |
| Z2417 | <i>dbpA</i> | ATP-dependent RNA helicase                                                              | COG0513LKJ | 2.2 |
| Z2745 | <i>rplT</i> | 50S ribosomal subunit protein L20, and regulator                                        | COG0292J   | 2.7 |
| Z2919 | <i>aspS</i> | aspartate tRNA synthetase                                                               | COG0173J   | 2.3 |
| Z3593 | <i>yfcB</i> | N5-glutamine S-adenosyl-L-methionine-dependent<br>methyltransferase                     | COG2890J   | 2.3 |
| Z3900 | <i>rplS</i> | 50S ribosomal protein L19                                                               | COG0335J   | 3.2 |
| Z3901 | <i>trmD</i> | tRNA (guanine-N(1)-)-methyltransferase                                                  | COG0336J   | 2.9 |



|              |             |                                                  |            |     |
|--------------|-------------|--------------------------------------------------|------------|-----|
| Z3902        | <i>yfiA</i> | 16S rRNA-processing protein                      | COG0806J   | 3.1 |
| Z3903        | <i>rpsP</i> | 30S ribosomal protein S16                        | COG0228J   | 3.0 |
| Z4418        | <i>rpsU</i> | 30S ribosomal protein S21                        | COG0828J   | 2.2 |
| Z4523        | <i>deaD</i> | ATP-dependent RNA helicase DeaD                  | COG0513LKJ | 3.8 |
| Z4529        | <i>infB</i> | translation initiation factor IF-2               | COG0532J   | 2.0 |
| Z4547        | <i>rpmA</i> | 50S ribosomal protein L27                        | COG0211J   | 2.2 |
| Z4588        | <i>rpsI</i> | 30S ribosomal protein S9                         | COG0103J   | 2.4 |
| Z4589        | <i>rplM</i> | 50S ribosomal protein L13                        | COG0102J   | 3.0 |
| Z4664        | <i>rplQ</i> | 50S ribosomal protein L17                        | COG0203J   | 4.0 |
| Z4666        | <i>rpsD</i> | 30S ribosomal protein S4                         | COG0522J   | 3.9 |
| Z4667        | <i>rpsK</i> | 30S ribosomal protein S11                        | COG0100J   | 3.2 |
| Z4668        | <i>rpsM</i> | 30S ribosomal protein S13                        | COG0099J   | 3.2 |
| Z4671        | <i>rplO</i> | 50S ribosomal protein L15                        | COG0200J   | 2.5 |
| Z4672        | <i>rpmD</i> | 50S ribosomal protein L30                        | COG1841J   | 3.4 |
| Z4673        | <i>rpsE</i> | 30S ribosomal protein S5                         | COG0098J   | 4.4 |
| Z4674        | <i>rplR</i> | 50S ribosomal protein L18                        | COG0256J   | 3.8 |
| Z4675        | <i>rplF</i> | 50S ribosomal protein L6                         | COG0097J   | 3.7 |
| Z4676        | <i>rpsH</i> | 30S ribosomal protein S8                         | COG0096J   | 4.0 |
| Z4677        | <i>rpsN</i> | 30S ribosomal protein S14                        | COG0199J   | 3.9 |
| Z4678        | <i>rplE</i> | 50S ribosomal protein L5                         | COG0094J   | 3.9 |
| Z4680        | <i>rplN</i> | 50S ribosomal protein L14                        | COG0093J   | 2.5 |
| Z4681        | <i>rpsQ</i> | 30S ribosomal protein S17                        | COG0186J   | 3.1 |
| Z4683        | <i>rpmC</i> | 50S ribosomal protein L29                        | COG0255J   | 2.9 |
| Z4684        | <i>rplP</i> | 50S ribosomal protein L16                        | COG0197J   | 3.6 |
| Z4685        | <i>rpsC</i> | 30S ribosomal protein S3                         | COG0092J   | 4.2 |
| Z4686        | <i>rplV</i> | 50S ribosomal protein L22                        | COG0091J   | 4.2 |
| Z4687        | <i>rpsS</i> | 30S ribosomal protein S19                        | COG0185J   | 4.0 |
| Z4688        | <i>rplB</i> | 50S ribosomal protein L2                         | COG0090J   | 4.6 |
| Z4689        | <i>rplW</i> | 50S ribosomal protein L23                        | COG0089J   | 4.2 |
| Z4690        | <i>rplD</i> | 50S ribosomal protein L4                         | COG0088J   | 4.7 |
| Z4691        | <i>rplC</i> | 50S ribosomal protein L3                         | COG0087J   | 3.3 |
| Z4692        | <i>rpsJ</i> | 30S ribosomal protein S10                        | COG0051J   | 3.9 |
| Z4697        | <i>tufA</i> | elongation factor Tu                             | COG0050J   | 2.4 |
| Z4754        | <i>yrfH</i> | ribosome-associated heat shock protein Hsp15     | COG1188J   | 3.8 |
| Z5194        | <i>rpmH</i> | 50S ribosomal protein L34                        | COG0230J   | 2.3 |
| Z5195        | <i>rnpA</i> | ribonuclease P                                   | COG0594J   | 5.6 |
| Z5556        | <i>rplK</i> | 50S ribosomal protein L11                        | COG0080J   | 3.1 |
| Z5557        | <i>rplA</i> | 50S ribosomal protein L1                         | COG0081J   | 2.9 |
| Z5558        | <i>rplJ</i> | 50S ribosomal protein L10                        | COG0244J   | 2.7 |
| Z5559        | <i>rplL</i> | 50S ribosomal protein L7/L12                     | COG0222J   | 2.2 |
| Z5809        | <i>rpsF</i> | 30S ribosomal protein S6                         | COG0360J   | 3.7 |
| Z5811        | <i>rpsR</i> | 30S ribosomal protein S18                        | COG0238J   | 3.7 |
| Z5812        | <i>rplI</i> | 50S ribosomal protein L9                         | COG0359J   | 2.9 |
| Z0067        | Z0067       | ATP-dependent helicase HepA                      | COG0553KL  | 2.9 |
| <b>Z0321</b> | Z0321       | putative AraC-type regulatory protein encoded in | COG2207K   | 2.4 |

|              |             |                                                                                                   |           |     |
|--------------|-------------|---------------------------------------------------------------------------------------------------|-----------|-----|
|              |             | prophage CP-933H                                                                                  |           |     |
| Z0376        | <i>ykgA</i> | putative AraC-like transcriptional regulator                                                      | COG4977K  | 2.8 |
| Z1754        | <i>mfd</i>  | transcription-repair coupling factor; mutation frequency decline                                  | COG1197LK | 2.0 |
| Z2514        | <i>rnb</i>  | RNase II, mRNA degradation                                                                        | COG4776K  | 2.1 |
| Z3476        | <i>rcsB</i> | transcriptional regulator RcsB                                                                    | COG2197TK | 2.1 |
| Z4258        | Z4258       | partial putative transcriptional regulator LYSR-type                                              | COG0583K  | 2.2 |
| Z4553        | <i>yrbA</i> | hypothetical protein                                                                              | COG5007K  | 2.7 |
| Z4665        | <i>rpoA</i> | DNA-directed RNA polymerase subunit alpha                                                         | COG0202K  | 3.5 |
| Z4762        | <i>yhgF</i> | hypothetical protein                                                                              | COG2183K  | 2.6 |
| Z5293        | <i>rho</i>  | transcription termination factor Rho                                                              | COG1158K  | 3.8 |
| Z5560        | <i>rpoB</i> | DNA-directed RNA polymerase subunit beta                                                          | COG0085K  | 3.1 |
| Z5561        | <i>rpoC</i> | DNA-directed RNA polymerase subunit beta'                                                         | COG0086K  | 2.5 |
| Z2536        | <i>topA</i> | DNA topoisomerase type I, omega protein                                                           | COG0550L  | 2.9 |
| Z2917        | Z2917       | dATP pyrophosphohydrolase                                                                         | COG0494LR | 2.4 |
| Z5191        | <i>recF</i> | recombination protein F                                                                           | COG1195L  | 2.2 |
| Z5192        | <i>dnaN</i> | DNA polymerase III subunit beta                                                                   | COG0592L  | 2.6 |
| Z5193        | <i>dnaA</i> | chromosomal replication initiation protein                                                        | COG0593L  | 2.7 |
| Z5343        | <i>recQ</i> | ATP-dependent DNA helicase RecQ                                                                   | COG0514L  | 2.1 |
| <b>Z5902</b> | Z5902       | putative helicase                                                                                 | COG0210L  | 2.5 |
| Z5973        | <i>hold</i> | DNA polymerase III subunit psi                                                                    | COG3050L  | 2.1 |
| Z0031        | <i>lspA</i> | prolipoprotein signal peptidase (SPase II)                                                        | COG0597MU | 2.0 |
| Z0034        | <i>lytB</i> | control of stringent response; involved in penicillin tolerance                                   | COG0761IM | 2.4 |
| Z0101        | <i>murC</i> | L-alanine adding enzyme, UDP-N-acetyl-muramate:alanine ligase                                     | COG0773M  | 2.4 |
| Z0194        | <i>lpxB</i> | tetraacyldisaccharide-1-P; lipid A biosynthesis, penultimate step                                 | COG0763M  | 2.2 |
| Z0204        | <i>cutF</i> | copper homeostasis protein (lipoprotein)                                                          | COG3015MP | 2.8 |
| Z0777        | <i>dacA</i> | D-alanyl-D-alanine carboxypeptidase, fraction A; penicillin-binding protein 5                     | COG1686M  | 2.4 |
| Z1980        | <i>hemM</i> | an enzyme in main pathway of synthesis of 5-aminolevulinate, possibly glutamyl-tRNA dehydrogenase | COG3017M  | 2.1 |
| Z2822        | <i>yeaF</i> | orf, hypothetical protein                                                                         | COG3713M  | 2.0 |
| Z3189        | <i>wzzB</i> | regulator of length of O-antigen component of lipopolysaccharide chains                           | COG3765M  | 2.4 |
| Z3473        | <i>ompC</i> | outer membrane porin protein C                                                                    | COG3203M  | 3.2 |
| Z4261        | <i>yggB</i> | mechanosensitive channel MscS                                                                     | COG0668M  | 2.4 |
| Z4392        | <i>tolC</i> | outer membrane channel protein                                                                    | COG1538MU | 2.1 |
| Z4552        | <i>murA</i> | UDP-N-acetylglucosamine 1-carboxyvinyltransferase                                                 | COG0766M  | 2.3 |
| Z4926        | <i>yhiU</i> | multidrug resistance efflux protein MdtE                                                          | COG0845M  | 2.2 |
| Z5299        | <i>rffG</i> | dTDP-glucose 4,6-dehydratase                                                                      | COG1088M  | 2.3 |
| Z0014        | <i>dnaK</i> | chaperone Hsp70; DNA biosynthesis; autoregulated heat shock proteins                              | COG0443O  | 4.6 |
| Z0015        | <i>dnaJ</i> | chaperone with DnaK; heat shock protein                                                           | COG0484O  | 3.6 |
| Z0033        | <i>slpA</i> | probable FKBPX-type 16KD peptidyl-prolyl cis-trans isomerase (a rotamase)                         | COG1047O  | 2.5 |

|              |              |                                                                 |          |      |
|--------------|--------------|-----------------------------------------------------------------|----------|------|
| Z0541        | <i>tig</i>   | trigger factor; a molecular chaperone involved in cell division | COG0544O | 3.9  |
| Z0545        | <i>lon</i>   | DNA-binding, ATP-dependent protease La; heat shock K-protein    | COG0466O | 3.4  |
| Z0590        | <i>htpG</i>  | chaperone Hsp90, heat shock protein C 62.5                      | COG0326O | 5.1  |
| Z0645        | <i>ybbN</i>  | putative thioredoxin-like protein                               | COG3118O | 2.6  |
| Z2330        | <i>hslJ</i>  | heat shock protein hslJ                                         | COG3187O | 2.3  |
| Z3886        | <i>clpB</i>  | protein disaggregation chaperone                                | COG0542O | 3.3  |
| Z3907        | <i>grpE</i>  | heat shock protein GrpE                                         | COG0576O | 2.7  |
| Z5183        | <i>ibpA</i>  | heat shock protein                                              |          | 3.8  |
| Z5478        | <i>hslU</i>  | ATP-dependent protease ATP-binding subunit                      | COG1220O | 3.2  |
| Z5479        | <i>hslV</i>  | ATP-dependent protease peptidase subunit                        | COG5405O | 3.2  |
| Z5747        | <i>groES</i> | co-chaperonin GroES                                             | COG0234O | 7.6  |
| Z5748        | <i>groEL</i> | chaperonin GroEL                                                | COG0459O | 6.4  |
| Z1034        | <i>dps</i>   | global regulator, starvation conditions                         | COG0783P | 3.0  |
| <b>Z1921</b> | Z1921        | unknown protein encoded by prophage CP-933X                     | COG3546P | 21.4 |
| Z2761        | <i>katE</i>  | catalase; hydroperoxidase HP(III)                               | COG0753P | 6.0  |
| Z4931        | <i>yhjA</i>  | putative cytochrome C peroxidase                                | COG1858P | 2.6  |
| Z5219        | <i>pstS</i>  | phosphate transporter subunit                                   | COG0226P | 2.4  |
| Z1044        | Z1044        | orf, hypothetical protein                                       | COG0561R | 2.4  |
| <b>Z1773</b> | Z1773        | unknown protein encoded by prophage CP-933N                     | COG5529R | 2.0  |
| Z2214        | <i>pqqL</i>  | putative peptidase                                              | COG0612R | 2.1  |
| Z2458        | <i>ycjX</i>  | putative EC 2.1 enzymes                                         | COG3106R | 3.3  |
| Z2653        | <i>ydhA</i>  | orf; Unknown function                                           | COG3895R | 5.8  |
| Z3059        | <i>yedU</i>  | chaperone protein HchA                                          | COG0693R | 2.9  |
| Z3396        | <i>yohJ</i>  | orf, hypothetical protein                                       | COG1380R | 2.3  |
| Z3445        | <i>yejK</i>  | nucleoid-associated protein NdpA                                | COG3081R | 2.7  |
| Z3575        | <i>cvpA</i>  | colicin V production protein                                    | COG1286R | 2.3  |
| Z4753        | <i>yrfG</i>  | putative phosphatase                                            | COG1011R | 2.3  |
| Z5198        | <i>thdF</i>  | tRNA modification GTPase TrmE                                   | COG0486R | 2.9  |
| Z0010        | <i>yaaH</i>  | orf, hypothetical protein                                       | COG1584S | 2.0  |
| Z0202        | Z0202        | orf; Unknown function                                           | COG4681S | 2.1  |
| Z1273        | <i>ycbK</i>  | orf, hypothetical protein                                       | COG3108S | 2.1  |
| <b>Z1498</b> | Z1498        | unknown protein encoded by bacteriophage BP-933W                | COG3111S | 3.3  |
| <b>Z1771</b> | Z1771        | unknown protein encoded by prophage CP-933N                     | COG4197S | 2.6  |
| <b>Z1922</b> | Z1922        | unknown protein encoded by prophage CP-933X                     | COG3685S | 20.4 |
| <b>Z1923</b> | Z1923        | unknown protein encoded by prophage CP-933X                     | COG3685S | 40.5 |
| <b>Z2099</b> | Z2099        | unknown protein encoded within prophage CP-933O                 | COG3111S | 2.9  |
| Z2554        | <i>yciF</i>  | putative structural proteins                                    | COG3685S | 4.4  |
| Z2555        | <i>yciE</i>  | orf, hypothetical protein                                       | COG3685S | 4.0  |
| Z2916        | <i>yebC</i>  | orf, hypothetical protein                                       | COG0217S | 2.2  |
| Z3579        | <i>dedA</i>  | hypothetical protein                                            | COG0586S | 3.0  |
| Z4298        | <i>yggU</i>  | hypothetical protein                                            | COG1872S | 2.9  |
| Z4920        | <i>yhiD</i>  | putative Mg(2+) transport ATPase                                | COG1285S | 4.3  |
| Z4923        | <i>hdeD</i>  | acid-resistance membrane protein                                | COG3247S | 65.5 |

|              |             |                                                             |           |     |
|--------------|-------------|-------------------------------------------------------------|-----------|-----|
| Z5628        | <i>yjbA</i> | phosphate-starvation-inducible protein PsiE                 | COG3223S  | 2.2 |
| Z2858        | Z2858       | orf, hypothetical protein                                   | COG2200T  | 2.4 |
| Z2948        | <i>yecG</i> | putative regulator                                          | COG0589T  | 3.0 |
| Z4408        | <i>ygiM</i> | putative signal transduction protein                        | COG3103T  | 2.1 |
| Z5407        | <i>yihK</i> | GTP-binding protein                                         | COG1217T  | 2.3 |
| Z0108        | <i>secA</i> | preprotein translocase; secretion protein                   | COG0653U  | 2.8 |
| <b>Z3097</b> | Z3097       | putative peptidase encoded within prophage CP-933U          | COG0740OU | 2.9 |
| Z5197        | <i>yidC</i> | putative inner membrane protein translocase component YidC  | COG0706U  | 2.4 |
| Z4927        | <i>yhiV</i> | putative transport system permease protein                  | COG0841V  | 2.3 |
| <b>Z5900</b> | Z5900       | hypothetical protein                                        | COG1002V  | 2.4 |
| Z0028        | Z0028       | orf, hypothetical protein                                   | -         | 5.6 |
| Z0208        | <i>rscF</i> | regulator in colanic acid synthesis; interacts with RcsB    | -         | 2.3 |
| Z0277        | <i>ykfE</i> | C-lysozyme inhibitor                                        | -         | 2.7 |
| <b>Z0311</b> | Z0311       | partial O replication protein for prophage CP-933H          | -         | 3.1 |
| <b>Z0340</b> | Z0340       | unknown protein encoded in prophage CP-933I                 | -         | 2.3 |
| <b>Z0753</b> | Z0753       |                                                             |           | 3.4 |
| Z0879        | Z0879       | orf, hypothetical protein                                   | -         | 2.6 |
| <b>Z0948</b> | Z0948       | unknown protein encoded by prophage CP-933K                 | -         | 2.2 |
| <b>Z0951</b> | Z0951       | putative exonuclease encoded by prophage CP-933K            | -         | 3.4 |
| <b>Z0952</b> | Z0952       | putative Bet recombination protein of prophage CP-933K      | -         | 3.8 |
| Z1023        | <i>ybiJ</i> | orf, hypothetical protein                                   | -         | 3.2 |
| <b>Z1428</b> | Z1428       | unknown protein encoded by bacteriophage BP-933W            | -         | 2.8 |
| <b>Z1429</b> | Z1429       | unknown protein encoded by bacteriophage BP-933W            | -         | 2.5 |
| <b>Z1435</b> | <i>exoW</i> | putative exonuclease of bacteriophage BP-933W               | -         | 2.8 |
| <b>Z1437</b> | <i>betW</i> | putative Bet recombination protein of bacteriophage BP-933W | -         | 3.8 |
| <b>Z1440</b> | <i>ssbW</i> | putative single-stranded DNA binding protein                | -         | 4.1 |
| <b>Z1451</b> | Z1451       | putative replication protein P of bacteriophage BP-933W     | -         | 2.9 |
| <b>Z1501</b> | Z1501       | unknown protein encoded by bacteriophage BP-933W            | -         | 3.4 |
| <b>Z1764</b> | <i>intN</i> | partial integrase for prophage CP-933N                      | -         | 2.4 |
| <b>Z1777</b> | Z1777       | unknown protein encoded by prophage CP-933N                 | -         | 2.5 |
| <b>Z1780</b> | Z1780       | unknown protein encoded by prophage CP-933N                 | -         | 2.1 |
| <b>Z1824</b> | Z1824       | unknown protein encoded by prophage CP-933N                 | -         | 3.1 |
| <b>Z1869</b> | Z1869       | putative replication protein P of prophage CP-933X          | -         | 3.1 |
| <b>Z1930</b> | Z1930       | putative protease encoded within prophage CP-933X           | -         | 3.5 |
| Z2229        | Z2229       | biofilm-dependent modulation protein                        | -         | 5.0 |
| Z2493        | <i>ymjA</i> | orf, hypothetical protein                                   | -         | 2.2 |
| <b>Z2560</b> | Z2560       | orf; Unknown function                                       | -         | 2.4 |
| Z2632        | Z2632       | orf, hypothetical protein                                   | -         | 3.1 |
| Z2713        | Z2713       | orf, hypothetical protein                                   | -         | 2.3 |
| Z2883        | Z2883       | orf, hypothetical protein                                   | -         | 2.7 |
| <b>Z3071</b> | <i>espJ</i> | unknown protein encoded within prophage CP-933U             | -         | 2.8 |
| <b>Z3352</b> | Z3352       | unknown protein encoded within prophage CP-933V             | -         | 2.3 |

|              |               |                                                                  |   |       |
|--------------|---------------|------------------------------------------------------------------|---|-------|
| <b>Z3355</b> | Z3355         | putative DNA replication protein P of prophage CP-933V           | - | 2.5   |
| <b>Z3363</b> | Z3363         | putative single-stranded DNA binding protein of prophage CP-933V | - | 4.5   |
| <b>Z3366</b> | Z3366         | putative recombination protein Bet of prophage CP-933V           | - | 3.5   |
| <b>Z3367</b> | Z3367         | putative exonuclease of prophage CP-933V                         | - | 3.2   |
| <b>Z3370</b> | Z3370         | unknown protein encoded within prophage CP-933V                  | - | 3.0   |
| <b>Z3371</b> | Z3371         | unknown protein encoded within prophage CP-933V                  | - | 3.7   |
| <b>Z3372</b> | Z3372         | unknown protein encoded within prophage CP-933V                  | - | 3.0   |
| Z3722        | Z3722         | hypothetical protein                                             | - | 3.5   |
| <b>Z4000</b> | Z4000         | hypothetical protein                                             | - | 2.3   |
| Z4126        | Z4126         | hypothetical protein                                             | - | 5.8   |
| Z4285        | <i>yqgC</i>   | hypothetical protein                                             | - | 3.1   |
| Z4663        | <i>yhdN</i>   | hypothetical protein                                             | - | 2.1   |
| Z4890        | <i>yhiM</i>   | acid resistance protein                                          | - | 44.3  |
| Z4921        | <i>hdeB</i>   | acid-resistance protein                                          | - | 101.4 |
| Z4922        | <i>hdeA</i>   | acid-resistance protein                                          | - | 96.5  |
| Z5808        | <i>yjfY</i>   | hypothetical protein                                             | - | 2.1   |
| Z5858        | <i>yjgG_1</i> | hypothetical protein                                             | - | 2.5   |

<sup>a</sup>The COGs was assigned based on the annotation of *E. coli* O157:H7 strain EDL933. -: COG group is not available; <sup>b</sup>The ratio of normalized hybridization intensities of the gene in C<sup>-</sup> variant RM6608W to that of in the C<sup>+</sup> variant RM6608R. All genes listed here passed the significance test as detailed in the materials and method section. Genes in bold are *E. coli* O157:H7 specific genes.

Table S6. Other direct repeats with perfect match identified in the *rcsB* gene<sup>a</sup>

| Number    | First position of DR | Second position of DR | Sequence of DR |
|-----------|----------------------|-----------------------|----------------|
| 1         | 1-8                  | 262-269               | ATGAACAA       |
| 2         | 19-25                | 247-254               | ATTATTG        |
| 3         | 30-36                | 257-264               | TGACCAT        |
| 4         | 51-57                | 290-296               | CGGTATT        |
| 5         | 126-133              | 267-274               | CAACAACC       |
| 6         | 133-141              | 347-355               | CTGCCGAAA      |
| 7         | 163-170              | 340-348               | ACCGATCT       |
| 8         | 186-192              | 213-220               | TAAGTAC        |
| <b>9</b>  | <b>192-198</b>       | <b>275-281</b>        | <b>CGGCGAT</b> |
| 10        | 304-310              | 592-599               | GATATCG        |
| 11        | 320-326              | 602-609               | TGCTGAA        |
| 12        | 379-385              | 556-563               | AAGAAAT        |
| <b>13</b> | <b>403-408</b>       | <b>452-458</b>        | <b>TCTCGCC</b> |
| 14        | 406-413              | 478-485               | CGCCTGTT       |

<sup>a</sup>Repeats in bold are the ones bordering the fragment that was eliminated in C<sup>+</sup> variant RM6607R (#13) and RM6608R (#9).

1. **Carter, M. Q., J. W. Louie, C. K. Fagerquist, O. Sultan, W. G. Miller, and R. E. Mandrell.** 2012. Evolutionary silence of the acid chaperone protein HdeB in enterohemorrhagic *Escherichia coli* O157:H7. *Appl Environ Microbiol* **78**:1004-14.
